1

**Title:**

2

**Structural control for the coordinated assembly into**

3

**functional pathogenic type-3 secretion systems**

4

5 **Authors**

6 Nikolaus Goessweiner-Mohr<sup>1,3,4,5\*\*</sup>, Vadim Kotov<sup>1,2,3,4,5\*\*</sup>, Matthias J. Brunner<sup>1,4,5</sup>, Julia

7 Mayr<sup>1,3,4,5</sup>, Jiri Wald<sup>1,2,3,4,5</sup>, Lucas Kuhlen<sup>8</sup>, Sean Miletic<sup>1,2,3,4,5</sup>, Oliver Vesper<sup>1,2,3,4,5</sup>,

8 Wolfgang Lugmayr<sup>1,2</sup>, Samuel Wagner<sup>6</sup>, Frank DiMaio<sup>7</sup>, Susan Lea<sup>8</sup>, Thomas C.

9 Marlovits<sup>1,2,3,4,5\*</sup>

10

11 \* Corresponding author, [marlovits@marlovitslab.org](mailto:marlovits@marlovitslab.org)

12 \*\* Equal contribution

13

14 **Affiliations:**

15 <sup>1</sup> University Medical Center Hamburg-Eppendorf (UKE), Martinistrasse 52, D-20246

16 Hamburg, Germany

17 <sup>2</sup> Centre for Structural Systems Biology (CSSB), Notkestrasse 85, D-22607 Hamburg,

18 Germany

19 <sup>3</sup> Deutsches Elektronen-Synchrotron Zentrum (DESY), Notkestrasse 85, D-22607

20 Hamburg, Germany

21 <sup>4</sup> Institute of Molecular Biotechnology GmbH (IMBA), Austrian Academy of Sciences,

22 Dr Bohr-Gasse 5, A-1030 Vienna, Austria

23 <sup>5</sup> Research Institute of Molecular Pathology (IMP), Campus-Vienna-Biocenter 1, A-1030

24 Vienna, Austria

25 <sup>6</sup> Interfaculty Institute of Microbiology and Infection Medicine, University of Tübingen,

26 Elfried-Aulhorn-Str. 6, 72076 Tübingen, Germany

27 <sup>7</sup> University of Washington, Department of Biochemistry, Seattle, Washington, USA

28 <sup>8</sup> Oxford University, Sir William Dunn School of Pathology, Oxford, United Kingdom

29

30

31 *Present address:*

32 NGM: Institute of Biophysics, Johannes Kepler University (JKU), Gruberstraße 40, 4020

33 Linz, Austria

34 MJB: SONN & PARTNER Patent Attorneys, Riemergasse 14, A-1010 Vienna, Austria

35 JM: Hookipa Biotech GmbH, Helmut-Qualtinger-Gasse 2, A-1030 Vienna, Austria

36

37

38

## 39 **Abstract**

40 Functional injectisomes of the type-3 secretion system assemble into highly defined and  
41 stoichiometric bacterial molecular machines essential for infecting human and other  
42 eukaryotic cells. However, the mechanism that governs the regulated step-wise assembly  
43 process from the nucleation-phase, to ring-assembly, and the filamentous phase into a  
44 membrane embedded needle complex is unclear. We here report that the formation of a  
45 megadalton-sized needle complexes from *Salmonella enterica* serovar Typhimurium  
46 (SPI-1, *Salmonella* pathogenicity island-1) with proper stoichiometries is highly  
47 structurally controlled competing against the self-assembly propensity of injectisome  
48 components, leading to a highly unusual structurally-pleiotropic phenotype. The structure  
49 of the entire needle complex from pathogenic injectisomes was solved by cryo electron  
50 microscopy, focused refinements (2.5-4 Å) and co-variation analysis revealing an overall  
51 asymmetric arrangement containing cyclic, helical, and asymmetric sub-structures. The  
52 centrally located export apparatus assembles into a conical, pseudo-helical structure and  
53 provides a structural template that guides the formation of a 24-mer cyclic, surrounding  
54 ring, which then serves as a docking interface comprising three different conformations  
55 for sixteen N-terminal InvG subunits of the outer secretin ring. Unexpectedly, the secretin  
56 ring excludes the 16<sup>th</sup> protein chain at the C-terminal outer ring, resulting in a pleiotropic  
57 16/15-mer ring and consequently to an overall 24:16/15 basal body structure. Finally, we  
58 report how the transition from the pseudo-helical export apparatus into the helical  
59 filament is structurally resolved to generate the protein secretion channel, which provides  
60 the structural basis to restrict access of unfolded effector substrates. These results

61 highlight the diverse molecular signatures required for a highly coordinated assembly  
62 process and provide the molecular basis for understanding triggering and transport of  
63 unfolded proteins through injectisomes.

64

## 65 **Keywords**

66 Type-3 secretion system, nanomachine, assembly, cryo electron microscopy, infection

## 67 **Introduction**

68 Molecular machines <sup>1,2</sup> can only perform their function in the cell if they assemble  
69 properly <sup>3</sup>. Hence, mis-assembly into non-functional or defective systems is energetically  
70 costly and could even result in unwanted side-effects to the cell. As a consequence,  
71 assembly processes of complex molecular machines composed of one or many copies of  
72 numerous components are tightly regulated including various control elements at the  
73 transcriptional, translational, post-translational or structural level. These elaborate  
74 controls ensure a spatiotemporal confined and defined order of assembly steps into  
75 functional complexes, such as the ribosome or the spliceosome, executed in a crowded  
76 cellular environment <sup>4,5</sup>.

77 Type-3 secretion systems (T3SSs) assemble at bacterial membranes into syringe-like  
78 nano-machines that are critical for bacterial infection by many human pathogens  
79 including *Salmonella*, *Shigella*, *Yersinia* or *EPEC* (enteropathogenic *E. coli*). They  
80 actively deliver toxic bacterial effector proteins into their respective host cells <sup>6</sup>. As a  
81 consequence, T3SS-mediated infection can be prevented by interfering with the



82 functionality of the T3SS <sup>7</sup>. The core of the T3SS (SPI-1, *Salmonella* pathogenicity  
83 island-1) is the needle complex (NC) <sup>8</sup>, a membrane-embedded structure that mediates  
84 contact between bacterial and eukaryotic cells and contains a shielded secretion path for a  
85 safe delivery of unfolded effector proteins <sup>9,10</sup>. The needle complex is intricately  
86 assembled from multiple proteins (Supplementary Table 7) in a series of stacking  
87 membrane rings (PrgH, PrgK, InvG) to form a ‘basal body’ from which a helical needle  
88 filament (PrgI) extends into the environment <sup>11,12</sup>. The basal body encompasses the  
89 centrally located export apparatus (SpaP, SpaQ, SpaR, SpaS, InvA), which defines the  
90 entry of the secretion path into the secretion channel <sup>10</sup> and continues into the filament by  
91 attaching it with the inner rod protein PrgJ. All these proteins are thus essential for T3SS  
92 function <sup>7,13</sup>. Recent structural investigation of the evolutionary related export apparatus  
93 from the flagellar system revealed a pseudo-helical arrangement of a ternary sub-complex  
94 <sup>14,15</sup> (FliP, FliQ, FliR (flagellar system)/SpaP, SpaQ, SpaR (injectisome), Supplementary  
95 Table 7). The FliPQR complex has been recombinantly produced in the absence of the  
96 flagellar context and the unusual packing of the individual protein chains, which all have  
97 been bioinformatically predicted as integral membrane proteins, together with the  
98 previous observation that the PQR-subcomplex precedes basal body/needle complex  
99 assembly (**‘initiation/nucleation phase’**) into functional pathogenic T3SSs (Figure 1a) <sup>13</sup>  
100 raises the question, as to how this is mechanistically controlled. Notably, ring formation  
101 of the inner (IR; PrgH, PrgK) and outer rings (OR; InvG) and their interaction into  
102 stacked rings (**‘ring-phase’**) to generate non-functional basal-body-like complexes can  
103 also occur in the absence of export apparatus proteins, suggesting that this processes is

104 self-sufficient<sup>13</sup>. Furthermore, the observation that the oligomericity of rings in the  
105 flagellar system can vary<sup>16</sup>, similar to earlier reports of different ring-diameters in  
106 pathogenic T3SSs<sup>17</sup>, together with increasingly high-resolution structural investigations  
107 of a defined oligomericity of the OR (15-mer) and the IR (24-mer)<sup>11,12,18</sup>, challenges  
108 how the OR and IR specifically interact and whether and how oligomericity is controlled.  
109 Ultimately, an answer to this conundrum would clarify whether a structurally singular or  
110 diverse group of physiologically relevant T3SSs exists.

111 Assembly of needle complexes is finalized by the growth and attachment of the filament  
112 to the export apparatus (**'filamentous phase'**, Figure 1a). This phase is already dependent  
113 on the secretion activity of the T3SS, which transports protomers of PrgJ and PrgI into  
114 the chamber of the basal body, where they assemble into a filamentous structure that  
115 connects to the export apparatus within and extends as a PrgI-only helical filament  
116 projecting away from the basal body<sup>6,17,19</sup>. Recent work has identified PrgJ residues that  
117 are in the vicinity of the export apparatus and a single helical turn of PrgJ has been  
118 suggested to serve as an adaptor to the filament<sup>20</sup>. Nevertheless, it remains largely  
119 unknown, how monomers of PrgJ and PrgI are packaged into a quaternary structure and  
120 attached to the export apparatus, which is critical to form the majority of the protein  
121 secretion channel within the basal body.

122 To dissect the coordinated process of the directionality of the assembly phases into needle  
123 complexes of pathogenic T3SSs and to understand the molecular signatures promoting  
124 high-order assembly and stability, we investigated the cryo electron microscopy  
125 structures of the entire wild-type (WT) and export-apparatus (EA) deletion mutant

126 complexes from *Salmonella enterica* serovar Typhimurium to 2.5-4 Å resolution and  
127 performed extensive mutational and functional analyses. We show that (1) oligomericity  
128 of the rings is controlled by the nucleating SpaPQR complex of the export apparatus, (2)  
129 an unusual structural pleiotropy is crucial for inter- and intra-ring stability, and (3) the  
130 synthesis of the intra-basal secretion channel is the consequence of a remarkable packing  
131 of the asymmetric export apparatus to the symmetrically helical filament. The fact that  
132 without a coordinated assembly line, highly structured basal body-like complexes can be  
133 assembled, but with a diverging quarternary architecture leading to non-functionality,  
134 emphasizes the necessity and importance of flawless assembly processes for molecular  
135 machines in general.

136

## 137 **Methods**

138 All relevant materials and methods are described in the supplementary documents  
139 (genetic manipulations, secretion assays, biochemical purifications, co-variation analyses,  
140 electron microscopy and analyses, sample vitrification and cryo electron microscopy,  
141 single particle and helical reconstructions, model building, model refinement and model  
142 validation, visualization, deposition).

143

144

145

## 146 **Results**

### 147 **The structure of the entire needle complex**

148 We first purified WT needle complexes<sup>10</sup> from *Salmonella*, and vitrified the sample on  
149 holey carbon grids containing a layer of either continuous carbon or a freshly made  
150 graphene oxide as a sample support (Supplementary Table 3). This procedure allowed us  
151 to image particles at a wider angular distribution (Supplementary Figure 5) during cryo  
152 electron microscopy. We subsequently determined the structure of the entire needle  
153 complex by single particle analysis. Due to the size and the flexibility of the needle  
154 complex<sup>11</sup> we applied focused refinements to various parts of the complex and resolved  
155 individual sub-structures to resolutions ranging from 2.6 to 4 Å (Figure 1b). While  
156 overall the needle complex is an asymmetric molecule, individual parts of the complex  
157 display non-symmetric (C1), cyclic (C8, C15, C18) and helical symmetries.

158

### 159 **The export apparatus proteins dictate inner ring symmetry**

160 Both, the IR (PrgH/PrgK) and the OR (InvG) are highly oligomeric rings that are able to  
161 self-assemble into a basal body even in the absence of the export apparatus<sup>13</sup>. Because of  
162 the tight and highly stable arrangement of InvG into a 60-strand beta-barrel and its ability  
163 to independently form the outer ring in the absence of IR components<sup>18</sup>, we  
164 hypothesized, whether the symmetry and the assembly of the larger IR with its 24-fold  
165 oligomeric state is governed by the InvG OR. We thus analyzed structures of purified and  
166 vitrified complexes from an InvG knock-out<sup>13</sup> and compared it to the wild type (WT)

167 basal body complex. We found that the IR dimension from the InvG knockout is  
168 indistinguishable from the WT, suggesting that the 24-fold symmetry as clearly observed  
169 in WT from end-on views is maintained (Figure 1c). Thus, the 24-fold IR-ring formation  
170 is independent from the presence of the outer membrane protein InvG.

171 To determine if the centrally located export apparatus (EA) of the needle complex  
172 controls IR symmetry, we next visualized complexes isolated from an EA-knockout strain  
173 ( $\Delta EA: \Delta spaPQRS, \Delta invA$ ). Remarkably, we found that the IR in these complexes is  
174 smaller in diameter and contains only 23 subunits, as observed from end-on-views  
175 (Figure 1c). To further identify, which components of the export apparatus are  
176 responsible for this atypical structural phenotype, we analyzed previously purified and  
177 vitrified structures from individual SpaPQR, InvA knock-out strains<sup>21</sup>. We found that  
178 structures obtained from an  $\Delta invA$  strain are WT-like, whereas structures recovered from  
179  $\Delta spaP$ ,  $\Delta spaQ$ , or  $\Delta spaR$  strains are indistinguishable from the complete EA knock-out  
180 (Supplementary Table 1). Interestingly, the complexes obtained from the  $\Delta spaS$  strain  
181 could be sub-classified in two phenotypes that either are WT-like (75%) or EA-knock-  
182 out-like (25%) (Figure 1d, Supplementary Figure 1, Supplementary Table 1). Together  
183 with earlier findings that PQR forms an initial complex during the assembly<sup>13</sup>, our  
184 observations lead us to propose a model that the PQR sub-complex generates a structural  
185 template for the formation of precisely 24-subunits of PrgH and PrgK, respectively, for  
186 the complete IR assembly.

187

188

189 **The structure of the export apparatus provides a structural template for needle**  
190 **complex assembly into functional injectisomes**

191 The structure of the EA bound in the center of the needle complex reveals a conical shape  
192 with a pseudo-helical arrangements of individual protein chains, displaying a P:Q:R =  
193 5:4:1 stoichiometry (Figure 2, Supplementary Figure 8, Supplementary Table 5). The sub-  
194 structure is structurally similar to reconstituted samples of the flagellar export apparatus  
195 <sup>15</sup>. The export apparatus proteins SpaP, SpaQ, SpaR, and SpaS have been  
196 bioinformatically predicted as membrane proteins containing alpha-helical hydrophobic  
197 stretches suggesting a canonical lateral organization in a lipid bilayer. However the spiral  
198 arrangement of 4 consecutive SpaQs at the bottom of the EA sub-structure generates a  
199 cork-screw-like hydrophobic belt (Figure 2c) consistent with the idea that SpaQ is in part  
200 lifted out of the membrane during the assembly<sup>15</sup>. A single chain of SpaR intersects the  
201 assembly of 5 successive SpaPs (Figure 2b), which conclude the upper part of the EA  
202 with a hydrophilic, acidic belt, indicating that these proteins do not behave as classical  
203 integral membrane proteins. The separation of the EA into two surrounding belts,  
204 different in their surface properties, demarcates its position relative to the surrounding  
205 PrgK ring (Figure 2c, d). At the corresponding position of the PrgK ring are two  
206 complementary enclosures established by a lower and conserved, largely hydrophobic  
207 (aspartate-92 to proline-98, Figure 2d,e (arrow)) and a higher hydrophilic loop (glycine-  
208 137 to proline-142) that project towards the EA. Starting from the bottom tip of the PQR  
209 conus, the PQR complex is slightly located off center relative to the projected center  
210 determined by the PrgK ring. From there, it spirals upwards and establishes hydrophobic

211 contacts primarily to the lower PrgK-loop (Figure 2d, lower, Supplementary Figure 2).  
212 Subsequent interactions to PrgK are determined by the curvature of the PQR-complex  
213 and are captured largely within the first half-circle of PrgK, explaining how the PQR  
214 complex provides a structural template for ring assembly. The interaction to PrgK is  
215 further stabilized by contacts of SpaP, which constitutes the upper part of the EA.  
216 Interestingly, the fourth component, SpaS, is not visible in the reconstructions suggesting  
217 that it has been largely stripped off during the purification. This is in agreement with  
218 earlier biochemical data <sup>13</sup>. Nevertheless, because SpaS only fractionally influences the  
219 efficiency of proper ring assembly, we considered that SpaS is localized at the PQR  
220 complex in the vicinity of the PrgK ring position. We thus performed a co-variation  
221 analysis, showing that indeed the strongest signals are obtained between SpaS-SpaQ and  
222 SpaS-SpaR (Supplementary Table 2). We used this information together with a template  
223 structure from a flagellar EA complex (unpublished data, S. Lea) to model SpaS onto the  
224 PQR complex (Figure 2f), demonstrating that the majority of SpaS is positioned along a  
225 conserved patch of the hydrophobic belt (Figure 2g) and surrounds the tip of the  
226 hydrophilic PQR conus. However, two SpaS loops reach into the conserved hydrophobic  
227 PrgK enclosure, thereby completing a circular packing of PQRS in the center of the PrgK  
228 ring (Figure 2d).

229 Taken together, the structure of the EA explains how the PQR/S-sub-structure can serve  
230 as a structural template for inner ring formation into physiologically relevant 24-mer  
231 complexes. This is also consistent with earlier biochemical observations that the export  
232 apparatus, in particular PQR, followed by PQRS forms a sub-structure that initiates

233 assembly into full WT basal body<sup>13</sup>. Our structure of the EA within fully assembled  
234 injectisomes also clarifies that the majority of PQR (and S) monomers are embedded  
235 outside a membrane bilayer and thus represent a class of molecules that either can be  
236 membrane proteins during assembly or soluble proteins within the complex.

237

### 238 **Active injectisomes are asymmetric and structurally pleiotropic**

239 Entire needle complexes are structurally complex due to their size, their stoichiometry  
240 and copy-number of polypeptide chains, their various symmetries (cyclic, helical) and  
241 asymmetry (pseudohelical conus) in sub-parts of the injectisome. As a consequence,  
242 many interactions at and between various parts are necessary to establish sufficient  
243 stability but also conformational flexibility, essential for assembly<sup>17</sup>. To address the  
244 relevant factors for proper needle complex assembly, we first analyzed the interaction of  
245 the larger inner (PrgH/K) and smaller outer membrane ring (InvG) by focused  
246 reconstructions at the interface of the IR and OR (Figure 3, Supplementary Figures 9-10).  
247 We found that 16 out of 24 PrgH monomers tightly associate with their ~30 amino acid  
248 C-terminal tails to 16 subunits of the N-terminal InvG-ring (domains N0-N1). They form  
249 8x2 beta-sheets (conformation ‘B’ and ‘C’ in PrgH) that intercalate between 16 beta-  
250 stranded InvG domains and thus establish together with InvG a large circular and flat  
251 beta-stranded ring facing the 24-mer PrgH/K ring (Figure 3a). Intercalation and formation  
252 of the C-terminal beta-sheet is essential to confer stability between the rings (Figure 3b)  
253 and explains previous functional data of truncated PrgH<sup>22,23</sup>. Furthermore, the remaining  
254 8 subunits of PrgH also form a short two-stranded beta-sheet (conformation ‘A’), which



255 binds to the exterior part of InvG as well as to a neighboring PrgH and presumably  
256 stabilizes the overall arrangement.

257 The 16-mer structure of the secretin InvG is in sharp contrast to previous high resolution  
258 structures that reported 15 subunits for this domain<sup>12</sup>. Interestingly, only the upper, C-  
259 terminal domain of InvG maintains a 15-mer ring, as shown in our 2.6 Å resolution  
260 structure (Supplementary Figure 11, Table 4) and similar to earlier reports<sup>18</sup>. This raises  
261 the question as to how the individual InvG monomers that start with their N-terminal  
262 domain linked to the larger inner ring span the periplasm and extend into a the 15-mer  
263 upper OM ring. We thus performed focused reconstructions in C1 of the full OR (Figure  
264 3c). At first, we found that the upper and lower domains of the OR are slightly tilted and  
265 that the continuous density bridging the constricted ‘neck-region’ (labelled in Figure 2a)  
266 is largely present only on one side of the neck. Notably, we found that indeed, the entire  
267 OR assembles into a lower 16-mer and an upper 15-mer ring, suggesting that the upper  
268 part of the 16th subunit is left out during the 15-mer ring assembly. Moreover, we found  
269 that the 16th InvG monomer is cleaved in isolated needle complexes, as demonstrated by  
270 the detection of a faster migrating band in Western blots using an antibody raised  
271 exclusively against the lower InvG-ring domains (N0-N1, Figure 3d). To test, whether the  
272 lower OR, represented by the N0-N1 domains of InvG, remains stable as a ring in the  
273 absence of the larger IR, as an indicator for stacking of preformed rings<sup>24</sup>, we established  
274 a mild disassembly protocol that selectively removes the IR components. Surprisingly,  
275 we found by cryo electron microscopy that the lower OR (N0-N1) becomes largely  
276 unstructured and the individual domains very flexible, whereas the upper secretin ring

277 maintains as a stable ring (Figure 3e). Similar observations have been reported upon  
278 isolation of only secretin-rings<sup>18</sup>. This demonstrates that the so-called ‘ring-forming’  
279 domains N0-N1<sup>12</sup> in the lower part of InvG are in fact unable to independently form  
280 stable rings and require the presence of the larger 24-mer inner membrane ring for (16-  
281 mer) ring formation. Consequently, we speculated, whether the stability of the entire  
282 secretin ring is largely mediated by the overall structural arrangement of the upper InvG  
283 ring. While the majority of the individual monomers are arranged side-by-side,  
284 generating a beta barrel with 60 strands tilted by +33°, a long C-terminal stretch (amino  
285 acids: V519-G557) interacts as an extended conformation at approximately -40° with two  
286 neighboring InvG monomers in the opposite direction (n-1, n-2) of the tilted strands  
287 (Figure 3f). To test, whether the C-terminal end of InvG indeed provides stability for  
288 upper ring formation, we generated C-terminal truncation mutants, probed for  
289 functionality and analyzed complex formation (Figure 3g). We found that truncations of  
290 only six amino acids already impacted, and ten amino acids that eliminate only a fraction  
291 of the very last alpha helix of InvG, completely abrogated needle complex formation and  
292 function (Figure 3g, Supplementary Figures 3 and 6).

293 Taken together, the InvG ring in functional needle complexes is structurally pleiotropic,  
294 displaying different stoichiometries in the upper and lower OR. The assembly of the  
295 secretin into functional needle complexes requires 16 monomers at the basal side to  
296 interact with 8x2 intercalating PrgH C-terminal domains (CTD) at the inner membrane. It  
297 is furthermore stabilized by binding of 8 additional ‘exterior’ PrgH-CTD’s, and 15 InvG  
298 protomers to form a stable ring at the apical side that connects to the outer membrane.

299

### 300 **The atomic structure of a dead-end T3SS**

301 The fact that complexes obtained from EA knock-outs exclusively adopt a 23-mer  
302 arrangement in the larger IR (Figure 1c) from otherwise native PrgH/PrgK proteins raises  
303 the question, as to how basal-body formation is structurally controlled. In order to gain  
304 detailed structural insight into the mechanism by which assembly into aberrant  
305 injectisomes diverges from assembly into functional systems, we determined the atomic  
306 structure of the export apparatus knock-out T3SS (Figure 4). We thus applied a similar  
307 purification strategy and observed by negative-stain electron microscopy that the entire  
308  $\Delta$ EA needle complex but also complexes isolated from strains of individual knock-outs  
309 for SpaP, SpaQ, and SpaR are less stable (Supplementary Figure 7). Very often, the larger  
310 inner and smaller outer membrane rings were displaced from the complexes.  
311 Interestingly, this behavior was largely absent upon vitrification, indicating that negative  
312 staining induces sufficient shear forces that induce structural deviations in isolated knock-  
313 out but not WT complexes. We solved the cryo electron microscopy structure from the  
314  $\Delta$ EA basal-body complex to 2.5-3.4 Å (C23; C1) resolution (Table 4). Overall, the PrgH/  
315 K ring adopts a 23-mer structure with a similar intertwined arrangement of non-tilted  
316 PrgH and 24° tilted PrgK (Supplementary Figure 4a) that stabilizes the large IR.  
317 Comparison of the interacting surfaces of neighboring (PrgH,PrgK):(PrgH,PrgK)  
318 protomers revealed a larger area in the  $\Delta$ EA 23-mer than in WT (23-mer: 4526.5 Å<sup>2</sup>; 24-  
319 mer (WT): 4435.5 Å<sup>2</sup>).  
320 Overall, the 23-mer ring has a smaller diameter (inner diameter 67Å) than in the WT

321 complex (inner diameter 73Å), with insufficient space for the EA located at the  
322 equivalent position and height relative to the PrgK rings (Figure 4, Supplementary Figure  
323 4b). This together with the previous packing of EA in WT complexes, establishes that the  
324 EA plays an essential role during assembly by generating a structural template that  
325 mechanistically counteracts the self-assembly propensity into rings and thus ensures  
326 formation of 24-mer rings.

327 To investigate the structural consequence of ring stacking to a 23-mer IR in respect to the  
328 interaction with the OM ring, we determined the upper and lower InvG ring from the  
329  $\Delta$ EA complex by focused reconstructions to a resolution of 2.7 and 2.8 Å, respectively.  
330 To our surprise, we found only a 15/15-mer arrangement of the secretin (Supplementary  
331 Figures 17 and 18). This is in sharp contrast to the 16/15-mer arrangement in WT  
332 complexes (Figure 3c). This observation is also consistent with the lack of detection of a  
333 faster migrating InvG band in Western blots (Figure 3d), suggesting that overall, the  
334 secretin protein InvG is able to adopt different configurations (15/15 and 16/15)  
335 dependent on the oligomericity of the larger inner ring. In pursuit of understanding the  
336 architecture of how a 23-mer ring interacts with a 15-mer to still being able to form  
337 mutant basal bodies, we solved the structure without symmetry enforcement (C1) (Figure  
338 4a, Supplementary Figure 16). Contrary to WT complexes that show a highly organized  
339 and repeated pattern at the IR/OR interface (8x conformation of 'A', 'B', 'C',  
340 respectively, see Figure 4b), the interface of the  $\Delta$ EA needle complex is irregular and  
341 asymmetric throughout the interaction circle (conformation 'A' (7x), 'B' (7x), 'C' (9x),  
342 Figure 4b). Despite the suboptimal structural arrangement of the interaction surface, it is

343 still surprising that basal body-like complexes can be formed suggesting that avidity also  
344 plays a role between ring-stabilization.

345

### 346 **Structure of the inner rod and internal filament**

347 The final step for needle complex assembly requires active transport of the inner rod  
348 protein PrgJ and the needle filament PrgI, which generate a filamentous sub-structure for  
349 the secretion of later substrates by connecting the pseudo-helical packing of the conical  
350 EA to the exterior helical needle filament structure (Figure 5a). Both proteins are small  
351 (101 residues in PrgJ, 80 residues in PrgI) and predominantly alpha helical in nature. To  
352 clarify, how PrgJ and PrgI connect and are arranged within needle complexes, we solved  
353 the cryo electron microscopy structure by focused refinements around the central part of  
354 the needle complex (Figure 3b, Table 4). We found that PrgJ adopts a two-legged alpha-  
355 helical structure with similar lengths (Figure 5b). Six PrgJ subunits are circularly, yet  
356 asymmetrically organized (for a single PrgJ only one alpha helix (\*) is visible; blue  
357 ribbon) and interact with the export apparatus protein SpaP. The arrangement establishes  
358 a space that is subsequently occupied by PrgI (yellow), allowing individual monomers to  
359 enter between and grow upwards as a helix. The helical parameters of the internal part of  
360 PrgI are similar to the reconstructions obtained from the external filament (twist/rise  
361  $63.3^\circ/4.4 \text{ \AA}$  in outer filament,  $63.4^\circ/4.3 \text{ \AA}$  in inner filament, Supplementary Figures 14  
362 and 15). PrgI also establishes contacts to the surrounding InvG secretin ring (Figure 5b),  
363 suggesting a firm stabilization of the filament within the basal body. Notably, the first  
364 five PrgI monomers (yellow) that are localized between the PrgJ monomers are partly

365 unstructured at amino acids 1-20 in contrast to later PrgI subunits throughout the helical  
366 assembly, suggesting that this is a crucial structure that allows the transition from a non-  
367 helical to a helical arrangement to occur.

368 Secretion of unfolded substrates occurs through the export apparatus and continues into  
369 the filamentous sub-structure. We thus analyzed the entire channel and found that it starts  
370 with a hydrophilic ring at its conical entry (Figure 5c, arrow). Shortly after, the channel  
371 snakes through a highly confined area, to then reach a space of approximately 12 Å in  
372 diameter, defined by the upper part of the export apparatus. Then, the channel continues  
373 through the filament with a slightly larger diameter (14-16 Å), similar to the dimensions  
374 observed in the external helical filament (16 Å). The highly confined areas are consistent  
375 with a mechanism that restricts passage of only completely unfolded proteins shortly after  
376 entry into the export apparatus <sup>10</sup>.

377

## 378 **Discussion**

379 Correct and spatio-temporal assembly of molecular machines is a prerequisite for their  
380 functioning within the cell. Here we have analyzed the molecular signatures required for  
381 the directional assembly of the megadalton-sized needle complex of pathogenic T3SSs  
382 and have elucidated requirements to establish stability among the proteins involved. We  
383 solved the structure of the prominent needle complex of the T3SS from *Salmonella*  
384 *enterica* serovar Typhimurium composed of > 200 polypeptides by cryoEM including co-  
385 variational data.

386 Our work provides the molecular basis of the requirement to form a functional complex  
387 and establishes a framework for a detailed analysis of the highly coordinated and  
388 structurally controlled assembly path. Comparison with dead-end complexes including  
389 mutational and functional data allows us to propose a model for the three consecutive  
390 assembly steps, starting from an initiating nucleation phase, progression through the ring-  
391 phase, to finalize the process in the filamentous phase.

392 We found that a tripartite PQR complex of the export apparatus located centrally within  
393 injectisomes generates a structure very similar to isolated and recombinantly produced  
394 flagellar export complexes<sup>14</sup>. This suggests that the PQR complex can form  
395 independently during the initiation/nucleation phase prior to ring-formation (Figure 6),  
396 which is also consistent with earlier biochemical findings<sup>13</sup>. A defined stoichiometry of  
397 PQR (5:4:1) is essential, as the resulting pseudo-helical, conical structure resembles a  
398 template for the lateral packing of exactly 24 monomers of PrgH and PrgK, the  
399 components of the larger inner ring. The export apparatus protein InvA is not involved in  
400 correct 24-mer ring formation, consistent with its physical location away from the core of  
401 the PQR complex revealed by cryo electron tomography<sup>12</sup>. However, SpaS increases the  
402 efficiency of precise assembly likely through its direct interaction at PQR and its  
403 immediate vicinity to PrgK. Indeed, the observation that in the absence of the PQR  
404 complex, the IR self-assembles to a 23-mer ring only and subsequently culminates in  
405 non-functional complexes, highlights the importance for a precise, structure-based  
406 control mechanism.

407 Similarly, the high propensity for self-assembly of InvG protomers into the upper part of

408 the OR, mediated by a highly intertwined arrangement of individual InvG monomers, and  
409 the inability of the N0-N1 InvG domain to maintain a stable ring structure for subsequent  
410 stacking to the larger IR to establish the basal body<sup>24,25</sup>, cannot be reconciled with the  
411 here found and unusual pleiotropic structure of the OR (16/15-mer) in isolated  
412 injectisomes. Contrary to a stacking model of pre-formed rings, our data convey that 16  
413 individual InvG protomers first connect with their N-terminal domains to the IR,  
414 allowing the distant C-terminal domain of InvG to stabilize into a 15-mer with a tightly  
415 interwoven OR 60-stranded beta-barrel. It remains unclear, why the 16<sup>th</sup> InvG of the OR  
416 is excluded from the upper part of the ring, resulting in a 16/15-mer configuration within  
417 functional injectisomes. It could, however, be explained by an evolutionary re-adaptation  
418 of existing secretin folds for stable ring formation employed in other systems, such as  
419 various 15/15-mer type-2 secretion systems<sup>26-28</sup>, yet constrained by the presence of a 24-  
420 mer IR. This hypothesis is also in agreement with the fact that InvG is able to adapt a  
421 15/15-mer configuration in isolated  $\Delta$ EA complexes. Taken together, this corroborates the  
422 idea that a coordinated, structurally constrained assembly process contains the self-  
423 assembly propensity of the outer ring component.

424 Finally, the growth of the filamentous sub-structure requires to connect to the export  
425 apparatus and to transition from a pseudohelical export apparatus rim to the actual helical  
426 needle filament. This transition is accomplished by a highly conserved, elegant packing  
427 of the inner rod protein PrgJ to SpaP on one side and to the needle filament proteins,  
428 which are packaged in between individual PrgJ protomers on the other side.

429 Polymerization of PrgI protomers leads to elongation of the needle filament that pushes



430 towards the septum of the OR. Subsequently, a conformational change is required to  
431 induce the opening of the septum and to allow the continuation of the needle filament  
432 growth into the extracellular space<sup>12</sup>. There, it serves as the connecting tube that allows  
433 the safe translocation of bacterial effector proteins into host cells. The observation that  
434 the PrgI filament structure within and outside of the basal body slightly differs, supports  
435 the idea of signal transduction mediated by a conformational change through the filament  
436 upon host cell contact<sup>29</sup>. Therefore, the structure of the entire needle complex presented  
437 in this study provides the basis for analyzing the mechanism of activation for secretion of  
438 toxic bacterial effectors in the future.

## 439 **Acknowledgments**

440 This project was supported by funds available to TCM at the Institute of Structural and  
441 Systems Biology at the University Medical Center Hamburg-Eppendorf, the Institute of  
442 Molecular Biotechnology (IMBA) of the Austrian Academy of Sciences, and the  
443 Research Institute of Molecular Pathology (IMP). TCM (and SM) received funding  
444 through grant I 2408-B22 furnished by the Austrian Science Fund (FWF).

445 VK was supported by Boehringer Ingelheim Fonds PhD fellowship. High-performance  
446 computing was possible through access to the HPC at DESY/Hamburg (Germany). and  
447 the Vienna Scientific Cluster (Austria). Electron microscopy was preformed at the CSSB  
448 Cryo-EM Multiuser facility (Krios, L120C) and the Vienna Biocenter Core Facilites  
449 (Polara, Morgagni).

450

451 **Author contributions**

452 NGM, VK, MJB, JM, JW, SM, OV, WL, SW, FD, TCM - designed experiments

453 NGM, JM, SW - prepared knockouts and mutants

454 NGM, VK, MJB, OV, SM, JM - purified injectisomes

455 NGM, JM, OV, SM, VK - biochemical tests

456 MJB, JW, WL - cryoEM data collection and image data management

457 MJB, VK, TCM - single particle and helical image data processing

458 VK - Co-variation analysis

459 NGM - de-novo building and validation

460 MJB, NGM, VK, LK, WL, FD, TCM - model building, refinements and interpretation

461 VK - prepared figures

462 SL, TCM - supervised model refinements

463 TCM – original draft

464 all authors – draft review and editing

465 TCM - supervised project

466

467 **References**

468 1. Alberts, B. The cell as a collection of protein machines: preparing the next

- 469 generation of molecular biologists. *Cell* **92**, 291–294 (1998).
- 470 2. Elber, R. & Kirmizialtin, S. Molecular machines. *Current Opinion in Structural*  
471 *Biology* **23**, 206–211 (2013).
- 472 3. Chari, A. & Fischer, U. Cellular strategies for the assembly of molecular machines.  
473 *Trends Biochem. Sci.* **35**, 676–683 (2010).
- 474 4. Galej, W. P. Structural studies of the spliceosome: past, present and future  
475 perspectives. *Biochim. Soc. Trans.* **46**, 1407–1422 (2018).
- 476 5. Davis, J. H. *et al.* Modular Assembly of the Bacterial Large Ribosomal Subunit. *Cell*  
477 **167**, 1610-1622.e15 (2016).
- 478 6. Galan, J. E., Lara-Tejero, M., Marlovits, T. C. & Wagner, S. Bacterial type III  
479 secretion systems: specialized nanomachines for protein delivery into target cells.  
480 *Annu Rev Microbiol* **68**, 415–38 (2014).
- 481 7. Sukhan, A., Kubori, T., Wilson, J. & Galan, J. E. Genetic analysis of assembly of the  
482 *Salmonella enterica* serovar Typhimurium type III secretion-associated needle  
483 complex. *J Bacteriol* **183**, 1159–67 (2001).
- 484 8. Kubori, T. *et al.* Supramolecular structure of the *Salmonella typhimurium* type III  
485 protein secretion system. *Science* **280**, 602–5 (1998).
- 486 9. Hu, B., Lara-Tejero, M., Kong, Q., Galán, J. E. & Liu, J. In Situ Molecular  
487 Architecture of the *Salmonella* Type III Secretion Machine. *Cell* **168**, 1065-1074.e10  
488 (2017).
- 489 10. Radics, J., Königsmair, L. & Marlovits, T. C. Structure of a pathogenic type 3  
490 secretion system in action. *Nat Struct Mol Biol* **21**, 82–87 (2014).

- 491 11. Schraidt, O. & Marlovits, T. C. Three-dimensional model of Salmonella's needle  
492 complex at subnanometer resolution. *Science* **331**, 1192–5 (2011).
- 493 12. Hu, J. *et al.* Cryo-EM analysis of the T3S injectisome reveals the structure of the  
494 needle and open secretin. *Nature Communications* **9**, 3840 (2018).
- 495 13. Wagner, S. *et al.* Organization and coordinated assembly of the type III secretion  
496 export apparatus. *PNAS* **107**, 17745–17750 (2010).
- 497 14. Johnson, S., Kuhlen, L., Deme, J. C., Abrusci, P. & Lea, S. M. The Structure of an  
498 Injectisome Export Gate Demonstrates Conservation of Architecture in the Core  
499 Export Gate between Flagellar and Virulence Type III Secretion Systems. *mBio* **10**,  
500 e00818-19, /mbio/10/3/mBio.00818-19.atom (2019).
- 501 15. Kuhlen, L. *et al.* Structure of the core of the type III secretion system export  
502 apparatus. *Nature Structural & Molecular Biology* **25**, 583–590 (2018).
- 503 16. Thomas, D. R., Morgan, D. G. & DeRosier, D. J. Rotational symmetry of the C ring  
504 and a mechanism for the flagellar rotary motor. *Proceedings of the National Academy*  
505 *of Sciences of the United States of America*. **96**, 10134–9 (1999).
- 506 17. Marlovits, T. C. *et al.* Structural insights into the assembly of the type III secretion  
507 needle complex. *Science* **306**, 1040–1042 (2004).
- 508 18. Worrall, L. J. *et al.* Near-atomic-resolution cryo-EM analysis of the Salmonella T3S  
509 injectisome basal body. *Nature* (2016). doi:10.1038/nature20576
- 510 19. Loquet, A. *et al.* Atomic model of the type III secretion system needle. *Nature* **486**,  
511 276–279 (2012).
- 512 20. Torres-Vargas, C. E. *et al.* The inner rod of virulence-associated type III secretion

- 513 systems constitutes a needle adapter of one helical turn that is deeply integrated into  
514 the system's export apparatus. *Molecular Microbiology* **0**, (2019).
- 515 21. Königsmaier, L. A study on the export apparatus of the Salmonella typhimurium type  
516 III secretion system. (uniwien, 2011).
- 517 22. Schraidt, O. *et al.* Topology and organization of the Salmonella typhimurium type III  
518 secretion needle complex components. *PLoS Pathog* **6**, e1000824 (2010).
- 519 23. Sanowar, S. *et al.* Interactions of the transmembrane polymeric rings of the  
520 Salmonella enterica serovar Typhimurium type III secretion system. *MBio* **1**, (2010).
- 521 24. Lara-Tejero, M. & Galán, J. E. The Injectisome, a Complex Nanomachine for Protein  
522 Injection into Mammalian Cells. *EcoSal Plus* **8**, (2019).
- 523 25. Deng, W. *et al.* Assembly, structure, function and regulation of type III secretion  
524 systems. *Nat. Rev. Microbiol.* **15**, 323–337 (2017).
- 525 26. Howard, S. P. *et al.* Structure and assembly of pilotin-dependent and -independent  
526 secretins of the type II secretion system. *PLoS Pathog* **15**, e1007731 (2019).
- 527 27. Yan, Z., Yin, M., Xu, D., Zhu, Y. & Li, X. Structural insights into the secretin  
528 translocation channel in the type II secretion system. *Nat. Struct. Mol. Biol.* **24**, 177–  
529 183 (2017).
- 530 28. Hay, I. D., Belousoff, M. J., Dunstan, R. A., Bamert, R. S. & Lithgow, T. Structure  
531 and Membrane Topography of the Vibrio-Type Secretin Complex from the Type 2  
532 Secretion System of Enteropathogenic *Escherichia coli*. *J Bacteriol* **200**, e00521-17, /  
533 jb/200/5/e00521-17.atom (2017).
- 534 29. Guo, E. Z. *et al.* A polymorphic helix of a Salmonella needle protein relays signals

- 535 defining distinct steps in type III secretion. *PLoS Biol.* **17**, e3000351 (2019).
- 536 30. Kyte, J. & Doolittle, R. F. A simple method for displaying the hydropathic character  
537 of a protein. *J. Mol. Biol.* **157**, 105–132 (1982).
- 538 31. Ashkenazy, H. *et al.* ConSurf 2016: an improved methodology to estimate and  
539 visualize evolutionary conservation in macromolecules. *Nucleic Acids Res* **44**, W344–  
540 W350 (2016).

541

542

## 543 Figure legends

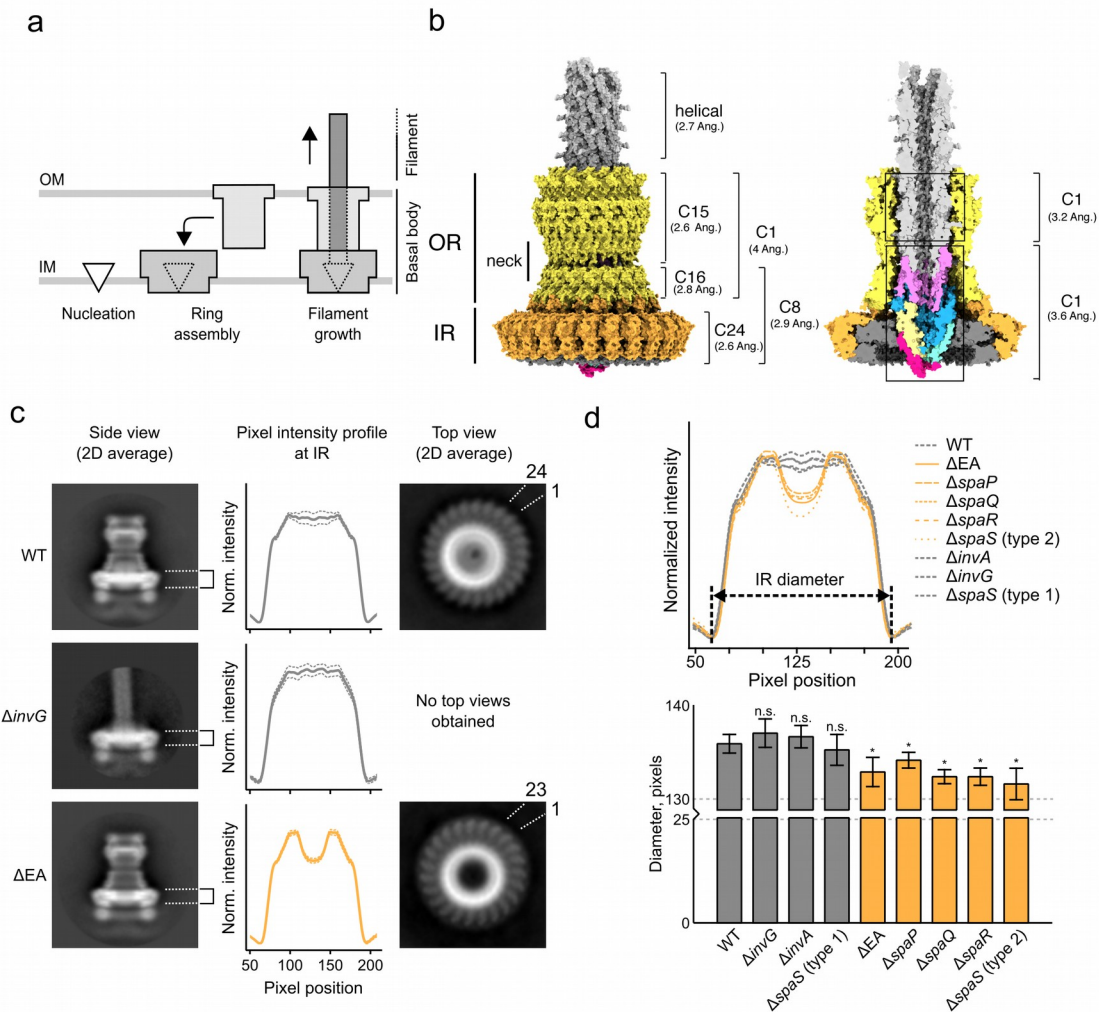

544

545 **Figure 1: The export apparatus (EA) is essential for assembly into active complexes**

546 a) Schematic of the overall organization and assembly phases of the T3SS needle  
547 complex.

548 b) Overview of the needle complex architecture and identified local symmetries.

549 c) Absence of the export apparatus components (SpaPQRS, InvA), but not OR  
550 components (InvG), results in a 23-fold symmetry of IR. Left column: 2D averages of  
551 single particle cryoEM side views of isolated WT,  $\Delta invG$  and  $\Delta EA$  complexes. Central  
552 column: Averaged density profile at the IR (dashed lines indicate standard deviation of  
553 averaged pixel values). Right column: 2D averages of single particle cryoEM top views  
554 of isolated WT and  $\Delta EA$  needle complexes. The number of IR protomers is indicated.

555 d) Upper: Averaged density profile from individual knock-out needle complexes. IR  
556 diameters are measured as the distance of the minima in the density profile. Graphs of  
557 complexes showing a WT-like diameter are colored in grey. Graphs of complexes with a  
558 significantly smaller diameter are colored in orange. A reduction of normalized pixel  
559 intensity in the central area of the IR plane is visible for the same knock-outs, indicating  
560 the absence of the EA.

561 Lower: Diameters of IR and statistical significance (\*). WT-like diameters colored in  
562 grey,  $\Delta EA$ -like diameters colored in orange. Complexes from a  $\Delta spaS$  mutant could be  
563 classified into, WT-like (type1) and  $\Delta EA$ -like phenotypes (type2). See also  
564 Supplementary Table 1.

565

566



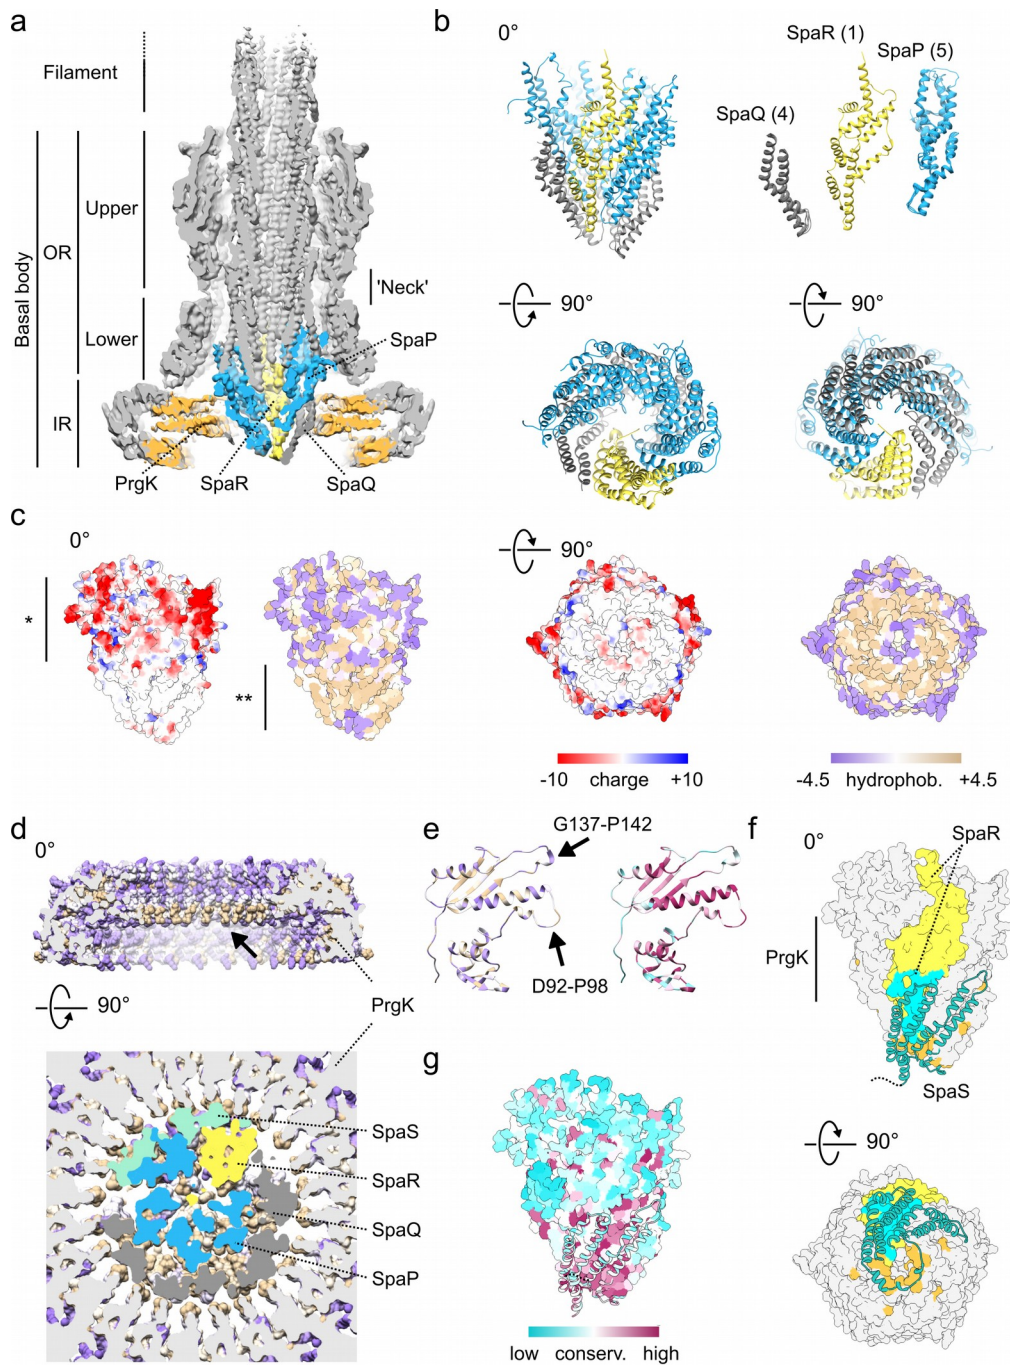

567

568 **Figure 2: The structure of export apparatus within the needle complex reveals a**  
569 **structural template for ring formation of active complexes**

570 a) Central cross-section of asymmetric (C1) single-particle reconstruction data of WT

571 needle complexes. OR: outer ring, IR: inner ring. Export apparatus components are  
572 colored in dark grey (SpaQ), yellow (SpaR) and dark cyan (SpaP), respectively. Densities  
573 for PrgK are colored in orange.

574 b) Structure of the PQR complex present in needle complexes shown as a ribbon diagram  
575 from different views (side, top, bottom). The PQR complex adopts a pseudo-helical  
576 arrangement with the sequential order of 4x SpaQ (dark grey), SpaR (yellow), and 5x  
577 SpaP. (Top right) Individual protein chains for SpaQ and SpaP, respectively, are  
578 structurally similar to each other (top-right corner). RMSD range for SpaQ: 1.3-2.4 Å,  
579 RMSD range for SpaP: 1.5-3.8 Å (see Supplementary Table 5).

580 c) The surface of the PQR complex contains a charged (\*) and a hydrophobic (\*\*) belt.  
581 The electrostatic potential was calculated according Coulomb's law (dielectric constant  
582  $\epsilon=4$ ). The hydrophobicity is colored according to the scale of Kyte and Doolittle<sup>30</sup>. Side  
583 views on the left are rotated around the x-axis to provide bottom-views of the EA on the  
584 right.

585 d) Upper: half-cut side view of the PrgK ring shows a hydrophobic and conserved loop  
586 facing the interior of IR (arrow). Lower: The hydrophobic belt of the PQR complex binds  
587 tightly to the surrounding hydrophobic PrgK ring.

588 e) The loop (aspartate-92 to proline-98) of PrgK is largely hydrophobic and conserved.

589 f) Homology model of SpaS (ribbon) bound to the PQR complex (surface). Evolutionary  
590 couplings between SpaS/SpaR and SpaS/SpaQ are shown in cyan and orange,  
591 respectively. Notably, SpaS twists in a circle around the conical PQR entry.

592 g) Surface representation of the PQR(S) complex colored by conservation as determined

593 by ConSurf<sup>31</sup>.

594

595

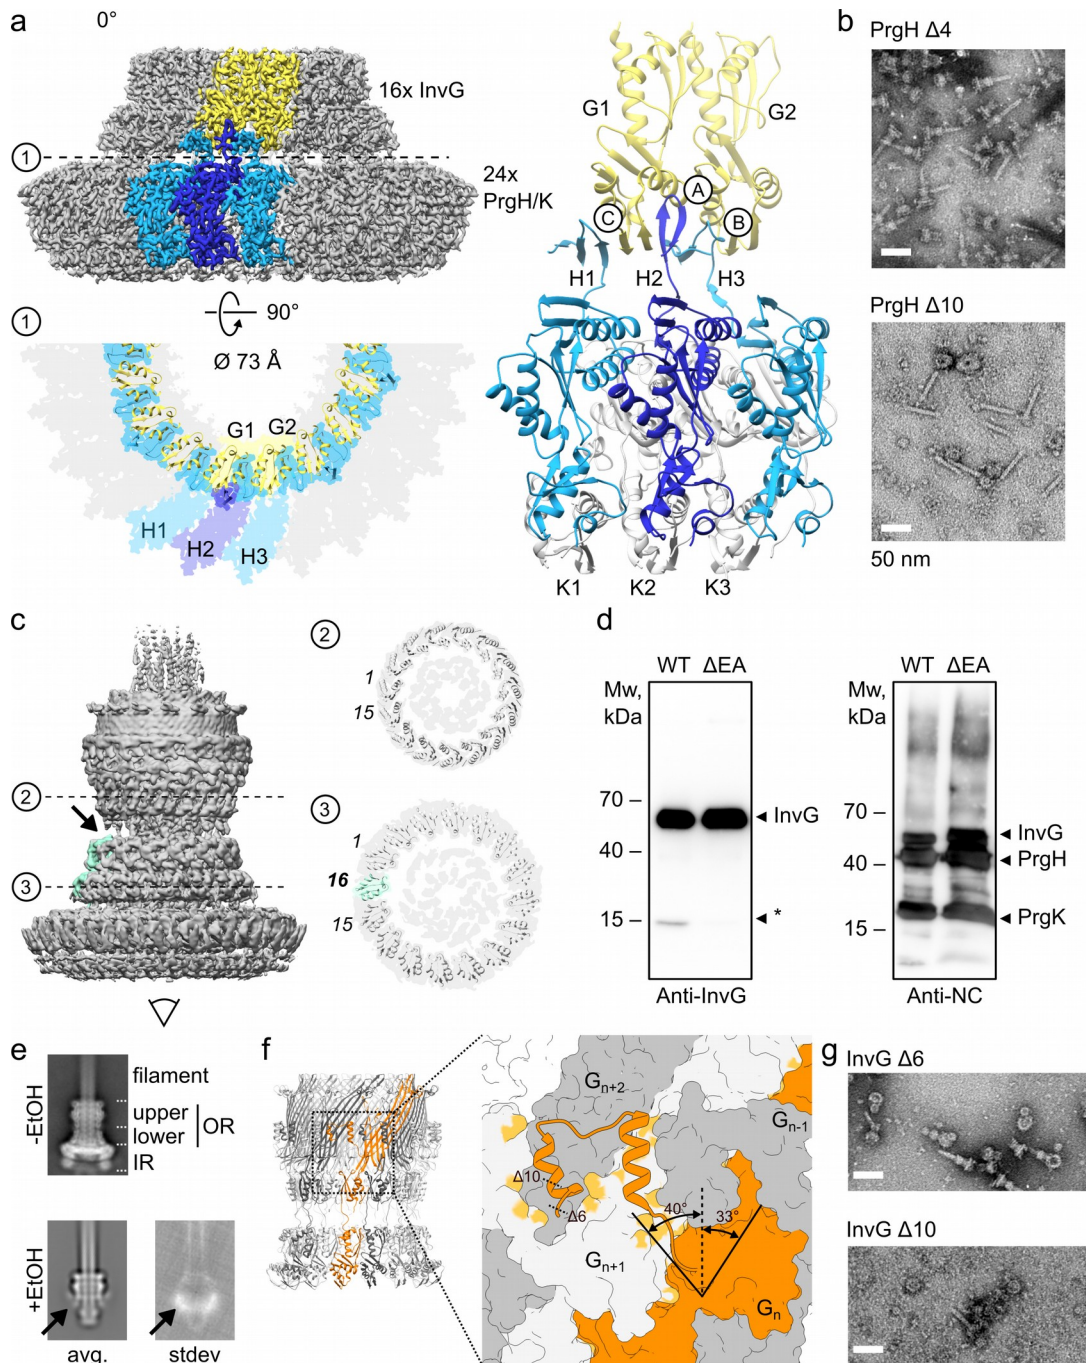

596

597 **Figure 3: WT needle complexes are asymmetric and structurally pleiotropic**

598 a) Cryo electron microscopy structure of the IR and OR of WT needle complexes.

599 Twenty four protomers of PrgH and PrgK, respectively, interact with sixteen InvG



600 protomers. The interaction is established by three repeating conformations at the C-  
601 terminal tail (amino acids 361-392, conformation ‘A’, ‘B’, ‘C’) of PrgH resulting in an  
602 extended circular beta-sheet composed of PrgH and InvG. The overall structure displays a  
603 C8 symmetry with 3 PrgH (H1, H2, H3, blue), 3 PrgK (K1, K2, K3, grey), and 2 InvG  
604 (G1, G2, yellow) in the asymmetric unit.

605 b) Successive truncations of amino acids at the PrgH C-terminus impair complex  
606 formation. Deletions of ten amino acids do not yield stable needle complexes as analyzed  
607 by electron microscopy. Scale bar 50 nm. See also Supplementary Figures 3 and 6.

608 c) The OR in WT needle complexes assembles into a lower 16-mer, and an upper 15-mer  
609 ring complex (C16/C15) that are slightly tilted towards each other. The 16<sup>th</sup> protomer of  
610 InvG in the lower ring is highlighted in green (C1 reconstruction). The connecting  
611 densities at the furthest distance at the constriction are missing on one side (arrow). Cross  
612 section of the upper and lower OR at the indicated positions.

613 d) Western blot detection of a faster migrating InvG band in isolated WT needle  
614 complexes using a polyclonal antibody raised against the N0-N1 domains of InvG. The  
615 band is not detected in  $\Delta$ EA mutant complexes. Other needle complex components are  
616 detected using an anti needle complex antibody.

617 e) Mild and selective needle complex disassembly. Class averages of vitrified samples  
618 prior and after ethanol treatment. In the absence of the IR, the lower OR does not  
619 maintain a ring conformation, whereas the upper OR stays intact. (avg (average) and  
620 stdev (standard deviation of class average). See also Supplementary Figures 3 and 6.

621 f) g) The C-terminus of InvG spans two neighboring InvG subunits and is critical for  
622 injectisome stability. Ribbon diagram of the entire 16/15-mer OR and zoomed in view in  
623 surface view. A single InvG (orange) interacts with two consecutive InvG protomers  
624 ( $G_{n+1}$ ,  $G_{n+2}$  light grey and dark grey, respectively). Positions of truncations ( $\Delta 6$  and  $\Delta 10$ )  
625 impacting complex assembly (g) are indicated with dashed line. Scale bar 50 nm. See  
626 also Supplementary Figures 3 and 6.

627

628

629

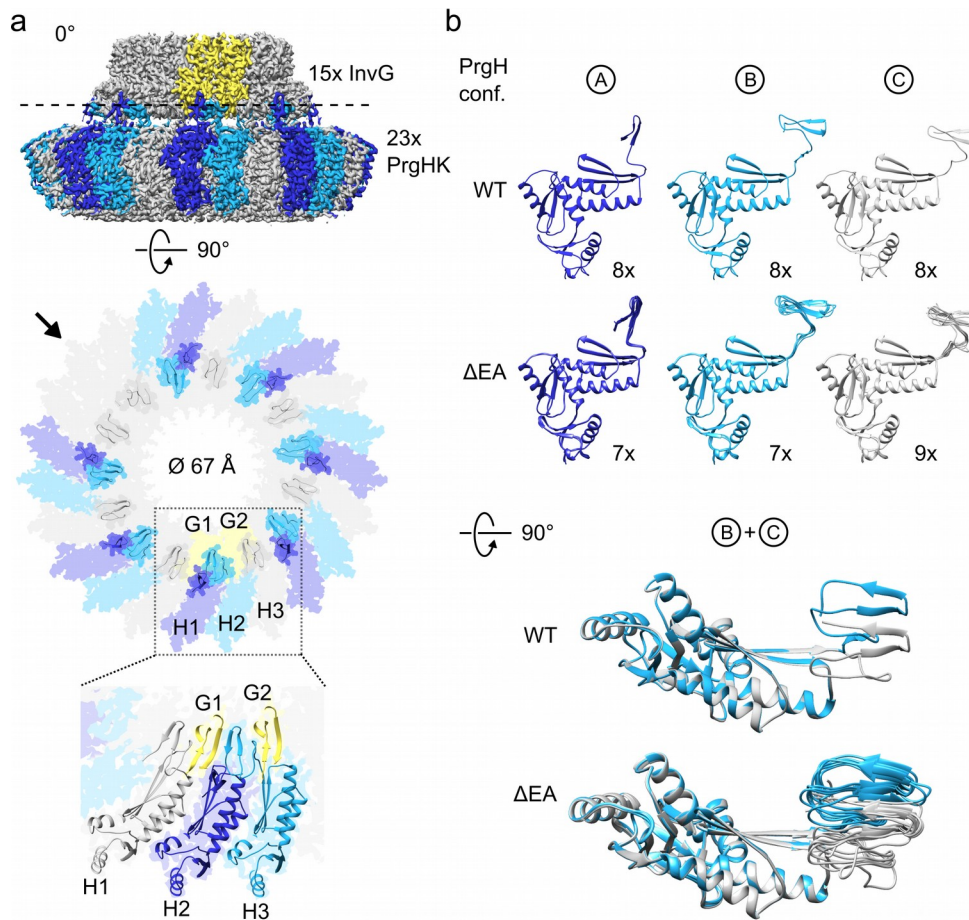

630

631 **Figure 4: The structure of dead-end complexes**

632 a) Cryo electron microscopy structure of complexes isolated from a  $\Delta$ EA strain. focused

633 reconstruction of the IR/OR (lower) in C1 revealed a 23:15 symmetry of IR:OR. Lower:

634 ribbon diagram of the IR/OR interaction. PrgH protomers showing the same

635 conformation at the C-terminal tails are indicated with the same colors. Zoomed view:

636 three protomers of PrgH with different conformations (H1, H2, H3), two protomers of

637 InvG (G1, G2). The symmetry break occurs at the position indicated with an arrow.

638 b) Three conformations of PrgH ('A', 'B', 'C') differ at the C-terminal tail of PrgH in WT

639 and in  $\Delta$ EA complexes, respectively. Conformation 'A' binds to the outside of InvG,  
640 whereas 'B' and 'C' intercalates between the N-terminal domains of InvG. In WT the 3  
641 conformations are arranged symmetrically (24 protomers: 8x each conformation),  
642 whereas in  $\Delta$ EA complexes 7x conformation 'A', 7x 'B', and 9x 'C' are arranged within  
643 the 23-mer PrgH ring.

644 Overall, the intercalating conformations 'B' and 'C' (362-392) have the same structural  
645 fold but differ in their lateral position relative to the main structure of PrgH.

646

647



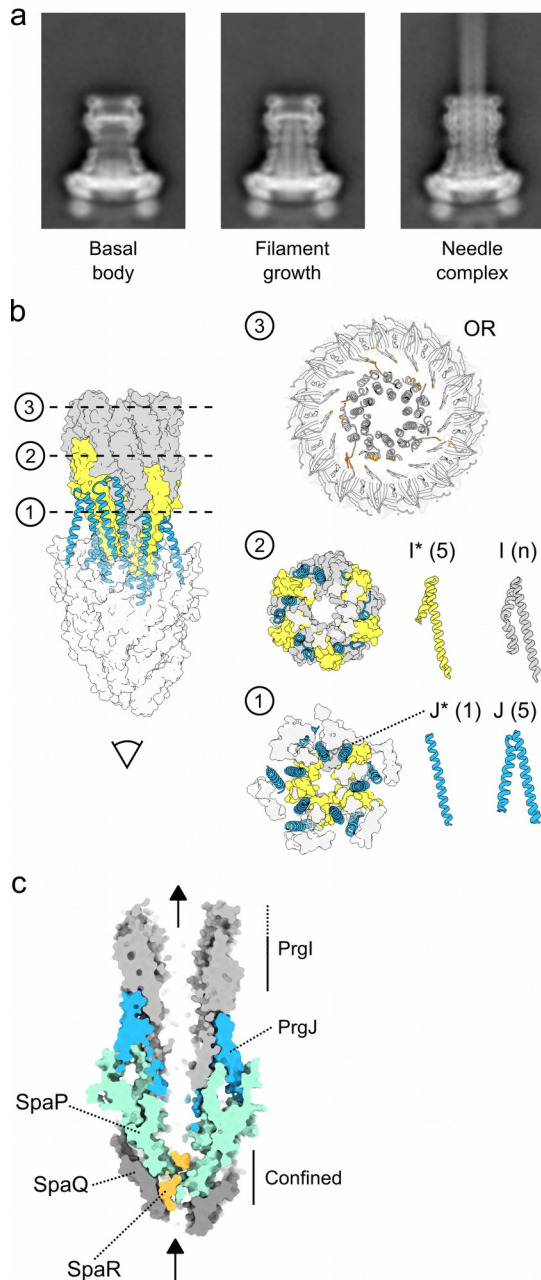

648

649 **Figure 5: The PQR complex, PrgJ and PrgI form an intricate secretion path for the**  
650 **substrate**

651 a) Distinct class averages of vitrified samples isolated from a WT resemble the transition  
652 from a basal body to the fully assembled needle complex. The internally growing

653 filament pushes towards the septum. In assembled needle complexes, the septum  
654 underwent a conformational change to allow extra-basal polymerisation of the needle  
655 filament.

656 b) Structure of the entire internal sub-structure. Six PrgJ and the initial five PrgI  
657 protomers serve as adaptors from pseudo-helical to a true-helical symmetry of the needle  
658 filament. Left: Overview of the EA to needle filament structure, shown as a surface side  
659 view with EA components in white, PrgJ subunits in blue ribbons representation and  
660 interlocked PrgIs in yellow (surface). Three cross-sections show the packing of PrgJ  
661 connecting to the EA ('1'), PrgI adaptors (yellow), and the helical PrgI filament stabilized  
662 by interactions (orange) to the surrounding upper InvG ring. (InvG ring not shown in side  
663 view). PrgJ forms two-legged helix-turn-helix structures that serve as pillars to support  
664 the filament (gray). (2) The helical arrangement of PrgJ is adapted by a single round of  
665 five PrgI protomers (yellow), with a distorted N-terminal region (I\*) similar to the  
666 distortion observed at one N-terminal helical leg of a single PrgJ (J\*) protomer. (3) The  
667 now purely symmetrical filament extends upwards within the OR InvG N-terminal  
668 secretin domain. Interacting residues of PrgI (N-termini) and InvG protomers are colored  
669 in orange. All proteins are shown in cartoon representation.

670 c) Substrate path through the EA, PrgJ, and the PrgI filament. The EA confines the  
671 substrate path that continues at the level of SpaP into a 12-16 Å wide channel.

672

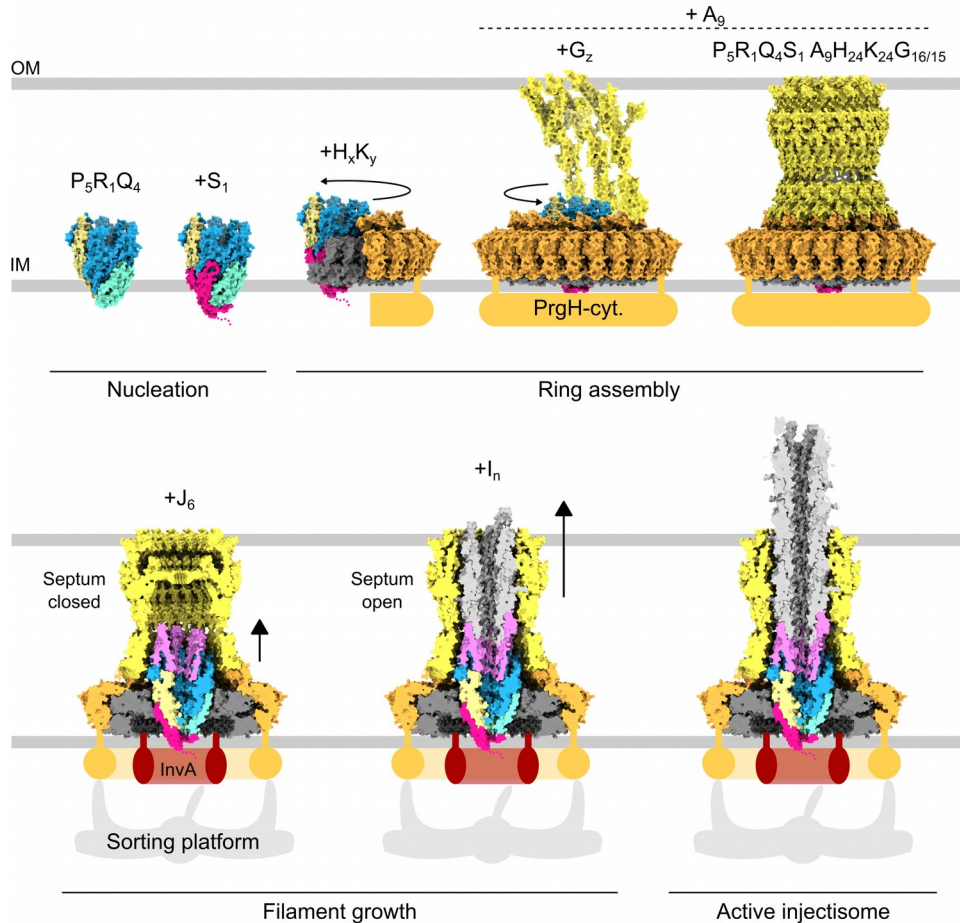

673

674 **Figure 6: Model of step-wise assembly of injectisomes**

675 Assembly of injectisomes is initiated in the nucleation phase that requires the export  
676 apparatus to form the PQR complex. During ring assembly, first the inner ring  
677 components PrgH and PrgK assemble to provide an interaction point for the outer ring  
678 protein InvG. Sixteen InvG molecules bind with their N-terminal domains to 24 PrgH  
679 tails but only fifteen C-terminal domain of InvG protomers arrange into a stable outer  
680 ring excluding the 16<sup>th</sup> InvG monomer. Subsequently, the filamentous phase is  
681 characterized by the growth of the internal secretion channel. PrgI and PrgJ are actively

682 transported by the T3SS and subsequently grow a filamentous sub-structure attached to  
683 the export apparatus. Transport of PrgJ and PrgI is dependent on the recruitment of the  
684 transiently interacting sorting platform harboring, among other components the T3SS-  
685 specific ATPase. During the growth of the inner PrgI filament, the closed septum in basal  
686 bodies undergoes a conformational change to allow extra-basal growth of the needle  
687 filament to continue. (IM – inner membrane; OR – outer membrane). SpaP – blue, SpaR  
688 – yellow, SpaQ – turquoise, SpaS – magenta, PrgK – grey, PrgH – orange, InvG – yellow,  
689 PrgJ – pink, PrgI – light grey)

690

1

## Supplementary Methods

2

Title:

3

**Structural control for the coordinated assembly into**

4

**functional pathogenic type-3 secretion systems**

5

6 **Authors**

7 Nikolaus Goessweiner-Mohr<sup>1,3,4,5\*\*</sup>, Vadim Kotov<sup>1,2,3,4,5\*\*</sup>, Matthias J. Brunner<sup>1,4,5</sup>, Julia

8 Mayr<sup>1,3,4,5</sup>, Jiri Wald<sup>1,2,3,4,5</sup>, Lucas Kuhlen<sup>8</sup>, Sean Miletic<sup>1,2,3,4,5</sup>, Oliver Vesper<sup>1,2,3,4,5</sup>,

9 Wolfgang Lugmayr<sup>1,2</sup>, Samuel Wagner<sup>6</sup>, Frank DiMaio<sup>7</sup>, Susan Lea<sup>8</sup>, Thomas C.

10 Marlovits<sup>1,2,3,4,5\*</sup>

11

12 \* Corresponding author, [marlovits@marlovitslab.org](mailto:marlovits@marlovitslab.org)

13 \*\* Equal contribution

14

15 **Affiliations:**

16 <sup>1</sup> University Medical Center Hamburg-Eppendorf (UKE), Martinistrasse 52, D-20246

17 Hamburg, Germany

18 <sup>2</sup> Centre for Structural Systems Biology (CSSB), Notkestrasse 85, D-22607 Hamburg,

19 Germany

20 <sup>3</sup> Deutsches Elektronen-Synchrotron Zentrum (DESY), Notkestrasse 85, D-22607

21 Hamburg, Germany

22 <sup>4</sup> Institute of Molecular Biotechnology GmbH (IMBA), Austrian Academy of Sciences,

23 Dr Bohr-Gasse 5, A-1030 Vienna, Austria

24 <sup>5</sup> Research Institute of Molecular Pathology (IMP), Campus-Vienna-Biocenter 1, A-1030

25 Vienna, Austria

26 <sup>6</sup> Interfaculty Institute of Microbiology and Infection Medicine, University of Tübingen,

27 Elfried-Aulhorn-Str. 6, D-72076 Tübingen, Germany

28 <sup>7</sup> University of Washington, Department of Biochemistry, Seattle, Washington, USA

29 <sup>8</sup> Oxford University, Sir William Dunn School of Pathology, Oxford, United Kingdom

30

31

32 *Present address:*

33 NGM: Institute of Biophysics, Johannes Kepler University (JKU), Gruberstraße 40, 4020

34 Linz, Austria

35 MJB: SONN & PARTNER Patent Attorneys, Riemergasse 14, A-1010 Vienna, Austria

36 JM: Hookipa Biotech GmbH, Helmut-Qualtinger-Gasse 2, A-1030 Vienna, Austria

37

38

## 39 **Methods**

### 40 **Generation of knockout strains**

41 The *InvG* knockout was created following the protocol of <sup>1</sup>. The overlapping sites on the  
42 knockout cassette were designed to substitute base pairs 8 to 1446 of the *invG* gene  
43 (*Salmonella enterica* serovar Typhimurium str. LT2, AE006468.2, bps 3,041,604 to  
44 3,043,292) to chloramphenicol resistance gene. The last 246 bps of *invG* were left intact  
45 to preserve the ribosomal binding site (RBS) for the next gene in the *inv* operon, thus  
46 avoiding polar effects of the deletion. The modified genomic region was subsequently  
47 transduced to a clean background strain (SB905) <sup>2</sup> by the *Salmonella*-specific phage P22.  
48 To remove the antibiotic resistance, the strain was transformed with the thermosensitive  
49 plasmid pCP20, containing the yeast *flp* recombinase gene, which removed the antibiotic  
50 resistance cassette via flanking FRT sites. The strain was cured from the plasmid by  
51 overnight incubation at 42°C. Knock-out strains for the entire export apparatus  
52 ( $\Delta spaPQRS$ ,  $\Delta invA$ ) and the individual export apparatus genes ( $\Delta spaP$ ,  $\Delta spaQ$ ,  $\Delta spaR$ ,  
53  $\Delta spaS$ ,  $\Delta invA$ ) have been described previously <sup>3</sup>.

54 Bacterial strains and phages used in this study are summarized in Supplementary Table 6.

55

### 56 **Complementation plasmids**

57 The  $\Delta invG$  *Salmonella* strain (SB908) was complemented with WHS008 generated by  
58 replacing the PrgH sequence in the plasmid WHS006 <sup>4</sup>. Additionally, a stop codon was  
59 introduced to avoid expression of the polyhistidine-tag.

60 C-terminal deletion variants of the complementation plasmids WHS006 (for  $\Delta prgH$   
61 complementation) and WHS008 (for  $\Delta invG$  complementation) were generated by an  
62 inverse site-directed mutagenesis protocol utilizing and checked by Sanger sequencing.

63 The plasmids were electroporated into  $\Delta prgH$  or  $\Delta invG$  *Salmonella* strains carrying the  
64 additional plasmid pSB1418, carrying *hila* gene, the main transcriptional regulator of  
65 SPI-1<sup>5</sup> controlled by the arabinose promoter.

66 Plasmids used in this study are summarized in Supplementary Table 6.

67

#### 68 **Secretion assay**

69 Secretion assays were conducted as previously described<sup>6</sup> with minor modifications.  
70 Briefly, starter cultures were grown overnight at 37 °C in LB medium supplemented with  
71 0.3 M NaCl and under antibiotic selection. Cultures were diluted 1:10 in 50 ml of the  
72 same medium without antibiotics. The expression of *hila* was induced by addition of  
73 0.012% (w/v) L-arabinose for another growth period of 5 h to allow for the assembly of  
74 functional injectisomes and expression of effector proteins. Afterwards, the cell density  
75 was adjusted with LB media to an OD<sub>600</sub> of 1.0 and the samples were centrifuged (6000 g  
76 for 15 min) to pellet the cells. Supernatants were collected and filtered with a 0.22 μM  
77 syringe filter to remove any residual cells. Pellets were resuspended in 1x PBS  
78 (phosphate buffered saline). Both supernatants and cell pellets were then immunoblotted  
79 with primary polyclonal rabbit antibodies raised against proteins of interest and  
80 secondary anti-rabbit HRP (horse radish peroxidase) conjugated antibodies (Qiagen).



81 Antibodies used in this study are summarized in Supplementary Table 6.

82

### 83 **Needle complex purification**

84 Preparation of the needle complexes was performed as described previously<sup>6,7</sup>. For  
85 assessing InvG and PrgH mutant/deletion versions, the protocol was scaled down by a  
86 factor of 4.

87 For selective needle complex disassembly, purified complexes were incubated with 20%  
88 v/v EtOH for 5 min at ambient temperature. The mixture was diluted with an equal  
89 volume of FR3 buffer (10 mM Tris-HCl, pH 8.0, 0.5 M NaCl, 5 mM EDTA., 0.1%  
90 LDAO) and loaded onto a Superose 6 10/300 GL column equilibrated with FR3 buffer at  
91 4°C. Fractions containing selectively disassembled needle complexes were pooled  
92 together, and analyzed by negative staining transmission electron microscopy. Optionally,  
93 samples were concentrated using centrifugal concentrators with a 30 kDa molecular  
94 weight cutoff.

95

### 96 **Co-variation/Evolutionary coupling analysis**

97 Co-variation between pairs of T3SS proteins was assessed using the EVCouplings  
98 complex pipeline<sup>8</sup> and RaptorX<sup>9</sup>. For EVCouplings the results were filtered to have a  
99 coupling score above 0.05, and probability score above 0.8; results with discrete EVC  
100 ratio were not considered. For RaptorX results the probability cutoff was 0.5. All results  
101 are summarized in Supplementary Table 2.

102

### 103 **Negative-stain electron microscopy**

104 Carbon coated copper grids (400mesh) were glow discharged (Bal-Tec, SCD 005) for 40  
105 seconds at 20 mA. Five  $\mu$ l of sample was applied to the grid and incubated for 30  
106 seconds. The sample was washed off with 5  $\mu$ l of staining solution (2% phospho-tungsten  
107 acetate, adjusted to pH 7.0 with NaOH) and stained with 5  $\mu$ l of the staining solution for  
108 20 sec. Micrographs were obtained at Morgagni 268D microscope (FEI) equipped with  
109 an 11 megapixel CCD camera (Olympus-SIS, Morada) or at a Talos L120C (FEI) with a  
110 4K Ceta CEMOS camera.

111

### 112 **Measurement and statistical analysis of inner ring diameters**

113 Pixel intensity values corresponding to the inner ring were extracted from class average  
114 images and averaged along the vertical Y-axis for each class. IR diameters were  
115 calculated as the distance between the two minima of the averaged profile (Figure 1c,d,  
116 Supplementary Figure 1). Resulting diameter values were tested for normality using  
117 either D'Agostino-Pearson omnibus K2 test (for n=8 and above) or Shapiro-Wilk test (for  
118 n <8) with 95% confidence interval. Levene's test with 95% confidence interval was used  
119 to assess the equality of variance. Unpaired t-test with 95% confidence interval was used  
120 to compare diameter measurements of mutants to the WT diameter. p-values are provided  
121 in Supplementary Table 1. Statistical analysis was performed in Python 2.7 using  
122 modules `scipy.stats` <sup>10</sup> and `pandas` <sup>11</sup>.

123

#### 124 **Sample vitrification and cryo electron microscopy**

125 For cryo electron microscopy, samples were vitrified on Quantifoil 1.2/1.3, 2/1, and 2/2  
126 with either an additional home-made layer of amorphous carbon (<1.6nm) or graphene  
127 oxide<sup>12</sup>. Briefly, 4ul of sample was applied onto glow-discharged grids and allowed to  
128 disperse for 0.5-2min. The grids were blotted for 4-7 s set at 100% humidity and plunge-  
129 frozen in liquid propane/ethane mixture cooled with liquid nitrogen to about minus 180-  
130 190 °C, by using a Vitrobot Mark V.

131 Vitrified specimens were imaged on a FEI Titan Krios operating at 300 kV and equipped  
132 with a field emission gun (XFEG) and a Gatan Bioquantum energy filter. Movies  
133 consisting of 25 frames were automatically recorded using FEI EPU software and the K2  
134 Summit camera in counting mode at a nominal magnification of 130kx, corresponding to  
135 1.09 Å per physical pixel. For individual frames, an electron dose of 1.1-1.26 e<sup>-</sup>/Å<sup>2</sup> was  
136 used, corresponding to a cumulative electron dose of 27.5-31.5 e<sup>-</sup>/Å<sup>2</sup> equally distributed  
137 over 5 sec movie. Movies were recorded at -0.8 - 3.5 μm defocus. Samples for diameter  
138 measurements were recorded with LEGINON<sup>13</sup> on a FEI Polara (300kV) equipped with  
139 field emission gun (FEG) and a Gatan CCD Camera (UHS 4000). Total electron dose was  
140 35 e<sup>-</sup>/Å<sup>2</sup>. The information on the datasets is summarized in Supplementary Table 3.

141

#### 142 **Single-particle reconstruction**

143 Single particle reconstructions were performed using Relion3<sup>14</sup>. Movies were motion-

144 corrected and dose-weighted and the CTF of the resulting micrographs was determined  
145 using CTFFIND4<sup>15</sup>. Particles were picked from the motion-corrected micrographs using  
146 Cryolo<sup>16</sup> trained with a sub-set of manually picked particles (4-fold binned. Particles  
147 were extracted using a boxsize of 432 pixels and subsequently binned four times for  
148 several rounds of 2D classifications. A cleaned and unbinned dataset was obtained by re-  
149 extraction and aligned to a rotationally averaged structure. Focused refinements with and  
150 without applying symmetry were performed to the individual sub-structures  
151 (Supplementary Table 4) using respective 3D masks. After converged refinements, per-  
152 particle CTF and Bayesian polishing was used to generate new data sets for another  
153 round of focused refinements. Overall gold-standard resolution (Fourier shell correlation  
154 (FSC) =0.143) and local resolution were calculated with Relion3. (Data sets from WT  
155 needle complex recorded over amorphous carbon and graphene oxide were processed  
156 separately and combined into a single data set after Bayesian polishing).

157

### 158 **Helical reconstruction of the outer needle filament**

159 Helical reconstruction was performed in Relion3<sup>17</sup> on the carbon dataset used for high-  
160 resolution refinement of the needle complex. The box center was moved from its original  
161 position at the basal body to the approximate middle of the filament by recalculating the  
162 particle coordinates according to the formulae:

$$163 \quad X' = X - \Delta X * \cos(\psi) - \Delta Y * \sin(\psi)$$

$$164 \quad Y' = Y + \Delta X * \sin(\psi) - \Delta Y * \cos(\psi)$$

165 Where X, Y are the initial particle coordinates (rlnCoordinateX and rlnCoordinateY fields  
166 in \*.star file),  $\Delta X$  and  $\Delta Y$  are the shifts of the particle as measured on a 2D class average  
167 and  $\psi$  is the in-plane rotation angle (rlnAnglePsi field in \*.star file).

168 Re-extracted particles were subjected to 2D classification. Classes where the helicity of  
169 the filament was most pronounced were used to convert box center coordinates to helix  
170 start and end coordinates using the formula above. Calculations of new coordinates were  
171 done with Python 2.7 and modules pandas and numpy<sup>11,18</sup>. Segments were extracted from  
172 micrographs into 300 pixel boxes with 28 pixel inter-box distance (defined by helical rise  
173 of 4.2 Å and 6 asymmetric units). In total 303 155 segments were extracted. The dataset  
174 was classified in 2D with tube diameter set to 95 Å and fine angular sampling. Classes  
175 that showed no evidence of overfitting and little or no extra density from the IR were  
176 selected for 3D auto-refinement procedure (total 133516 segments). Tube diameter was  
177 set to 95 Å, and the initial values for helical twist and rise were 64° and 4.2 Å (as  
178 determined in<sup>19</sup>). Helical parameter search range was  $\pm 20\%$ , and a soft-edged cylinder  
179 with diameter 95 Å was used as an initial model. The resulting model was then subjected  
180 to CTF refinement and Bayesian polishing. Where applicable the initial models were low-  
181 pass filtered to 25 Å to keep the helical lattice intact while removing any high-resolution  
182 components. The map, filtered according to its local resolution in Relion, was  
183 symmetrized in real space using the refined values of helical twist and rise to generate the  
184 final map.

185

186

187 **Building, refinement and validation of needle complex models**

188 *Templates and initial model generation*

189 Existing models of PrgH (PDB: 3GR1) and PrgK (PDB: 3GR5), and InvG (4G08, G34-  
190 I173; lower OR) were preliminary placed into the respective EM maps (IR: WT 24-mer,  
191 ΔEA 23-mer; lower OR: WT 16mer, ΔEA 15mer; Supplementary Table 4) utilizing UCSF  
192 Chimera's `fitmap` command<sup>20</sup>. The models were further refined using Rosetta<sup>21</sup>  
193 controlled via StarMap 1.0 (manuscript in preparation).

194 The upper OR was modelled into the 15mer symmetrized EM map by building InvG  
195 (R177-G557) *ab initio* with Coot<sup>22</sup>, starting with well defined secondary structure  
196 elements. The growing model was iteratively refined using Rosetta (controlled by  
197 Starmap), followed by several rounds of model extension and manual improvement in  
198 Coot.

199 Models for the upper and lower OR were connected in Coot based on densities obtained  
200 through focused refinements of the neck region.

201 Homology models for SpaP, SpaQ, SpaR, SpaS were generated with SWISS-  
202 MODEL<sup>23</sup> based on FliP, FliQ, FliR, and FliS from *Vibrio mimicus* (personal  
203 communication, S. Lea); PrgJ was modelled using Phyre2<sup>24</sup>. PrgI (PDB 2LPZ) and  
204 models for SpaP, SpaQ, SpaR, SpaS, and PrgJ were preliminary placed into the  
205 respective EM map, extended if necessary, and refined using Rosetta (Starmap) and  
206 Coot.

207

208 *Model refinement and validation*

209 All resulting models were manually extended and refined using Coot, and subsequently  
210 subjected to another round of refinement using Rosetta. The quality of the individual  
211 models were analyzed using the MolProbity server <sup>25</sup> and parts of the models further  
212 refined if necessary.

213 Overall map/model FSCs as well as Z-scores <sup>26</sup> were calculated with Starmap to assess  
214 the quality of the models. Z-scores were colored for each model using Chimera <sup>20</sup>.

215

216 **Visualization, analysis and deposition**

217 UCSF Chimera <sup>20</sup> and ChimeraX <sup>27</sup> were used for molecular visualization. Analysis of  
218 interaction surfaces between inner ring components PrgH and PrgK in the WT and  $\Delta$ EA  
219 T3SS needle complex were performed with the PDBePISA server <sup>28</sup>. Angles in InvG were  
220 measured with MB-Ruler (MB-Software solutions, version 5.3). Plots were made with  
221 matplotlib <sup>29</sup>.

222 EM maps are deposited at the EMDB (<https://www.emdataresource.org>). Coordinates of  
223 models are deposited at the ePDB database. Supplementary Table 4 summarizes the  
224 depositions submitted in this study.

225

226 **References**

227 1. Datsenko, K. A. & Wanner, B. L. One-step inactivation of chromosomal genes in

- 228 *Escherichia coli* K-12 using PCR products. *PNAS* **97**, 6640–6645 (2000).
- 229 2. Sukhan, A., Kubori, T., Wilson, J. & Galan, J. E. Genetic analysis of assembly of the  
230 *Salmonella enterica* serovar Typhimurium type III secretion-associated needle  
231 complex. *J Bacteriol* **183**, 1159–67 (2001).
- 232 3. Wagner, S. *et al.* Organization and coordinated assembly of the type III secretion  
233 export apparatus. *PNAS* **107**, 17745–17750 (2010).
- 234 4. Schraidt, O. *et al.* Topology and organization of the *Salmonella typhimurium* type III  
235 secretion needle complex components. *PLoS Pathog* **6**, e1000824 (2010).
- 236 5. Hueck, C. J. Type III protein secretion systems in bacterial pathogens of animals and  
237 plants. (1998).
- 238 6. Radics, J., Königsmair, L. & Marlovits, T. C. Structure of a pathogenic type 3  
239 secretion system in action. *Nat Struct Mol Biol* **21**, 82–87 (2014).
- 240 7. Schraidt, O. & Marlovits, T. C. Three-dimensional model of *Salmonella*'s needle  
241 complex at subnanometer resolution. *Science* **331**, 1192–5 (2011).
- 242 8. Hopf, T. A. *et al.* Sequence co-evolution gives 3D contacts and structures of protein  
243 complexes. *eLife* **3**, e03430 (2014).
- 244 9. Zeng, H. *et al.* ComplexContact: a web server for inter-protein contact prediction  
245 using deep learning. *Nucleic Acids Res.* **46**, W432–W437 (2018).
- 246 10. Jones, E., Oliphant, T., Peterson, P. & others. *SciPy: Open source scientific tools for*  
247 *Python*. (2001).
- 248 11. McKinney, W. Data Structures for Statistical Computing in Python. in *Proceedings of*  
249 *the 9th Python in Science Conference* (eds. Walt, S. van der & Millman, J.) 51–56



- 250 (2010).
- 251 12. Martin, T. G. *et al.* Design of a molecular support for cryo-EM structure  
252 determination. *PNAS* **113**, E7456–E7463 (2016).
- 253 13. Suloway, C. *et al.* Automated molecular microscopy: the new Legimon system. *J*  
254 *Struct Biol* **151**, 41–60 (2005).
- 255 14. Zivanov, J. *et al.* New tools for automated high-resolution cryo-EM structure  
256 determination in RELION-3. *eLife* **7**, e42166 (2018).
- 257 15. Zhou, A. *et al.* Structure and conformational states of the bovine mitochondrial ATP  
258 synthase by cryo-EM. *eLife Sciences* e10180 (2015). doi:10.7554/eLife.10180
- 259 16. Torres-Vargas, C. E. *et al.* The inner rod of virulence-associated type III secretion  
260 systems constitutes a needle adapter of one helical turn that is deeply integrated into  
261 the system's export apparatus. *Molecular Microbiology* **0**, (2019).
- 262 17. He, S. & Scheres, S. H. W. Helical reconstruction in RELION. *Journal of Structural*  
263 *Biology* **198**, 163–176 (2017).
- 264 18. Oliphant, T. E. *Guide to NumPy*. (CreateSpace Independent Publishing Platform,  
265 2015).
- 266 19. Loquet, A. *et al.* Atomic model of the type III secretion system needle. *Nature* **486**,  
267 276–279 (2012).
- 268 20. Pettersen, E. F. *et al.* UCSF Chimera--a visualization system for exploratory research  
269 and analysis. *J Comput Chem* **25**, 1605–1612 (2004).
- 270 21. DiMaio, F. *et al.* Atomic-accuracy models from 4.5-Å cryo-electron microscopy data  
271 with density-guided iterative local refinement. *Nat. Methods* **12**, 361–365 (2015).

- 272 22. Emsley, P., Lohkamp, B., Scott, W. G. & Cowtan, K. Features and development of  
273 Coot. *Acta Cryst D* **66**, 486–501 (2010).
- 274 23. Bordoli, L. *et al.* Protein structure homology modeling using SWISS-MODEL  
275 workspace. *Nat Protoc* **4**, 1–13 (2009).
- 276 24. Kelley, L. A., Mezulis, S., Yates, C. M., Wass, M. N. & Sternberg, M. J. E. The  
277 Phyre2 web portal for protein modeling, prediction and analysis. *Nature Protocols*  
278 **10**, 845–858 (2015).
- 279 25. Chen, Z. W. *et al.* Mutations in the Salmonella enterica serovar Choleraesuis cAMP-  
280 receptor protein gene lead to functional defects in the SPI-1 Type III secretion  
281 system. *Vet Res* **41**, 5 (2010).
- 282 26. Wang, R. Y.-R. *et al.* De novo protein structure determination from near-atomic-  
283 resolution cryo-EM maps. *Nat Meth* (2015). doi:10.1038/nmeth.3287
- 284 27. Goddard, T. D. *et al.* UCSF ChimeraX: Meeting modern challenges in visualization  
285 and analysis. *Protein Sci.* **27**, 14–25 (2018).
- 286 28. Krissinel, E. & Henrick, K. Inference of macromolecular assemblies from crystalline  
287 state. *J. Mol. Biol.* **372**, 774–797 (2007).
- 288 29. Hunter, J. D. Matplotlib: A 2D Graphics Environment. *Computing in Science &*  
289 *Engineering* **9**, 90–95 (2007).
- 290 30. Cherepanov, P. P. & Wackernagel, W. Gene disruption in Escherichia coli: TcR and  
291 KmR cassettes with the option of Flp-catalyzed excision of the antibiotic-resistance  
292 determinant. *Gene* **158**, 9–14 (1995).
- 293 31. Marlovits, T. C. *et al.* Structural insights into the assembly of the type III secretion

294 needle complex. *Science* **306**, 1040–1042 (2004).

295

## 296 **Supplementary figures**

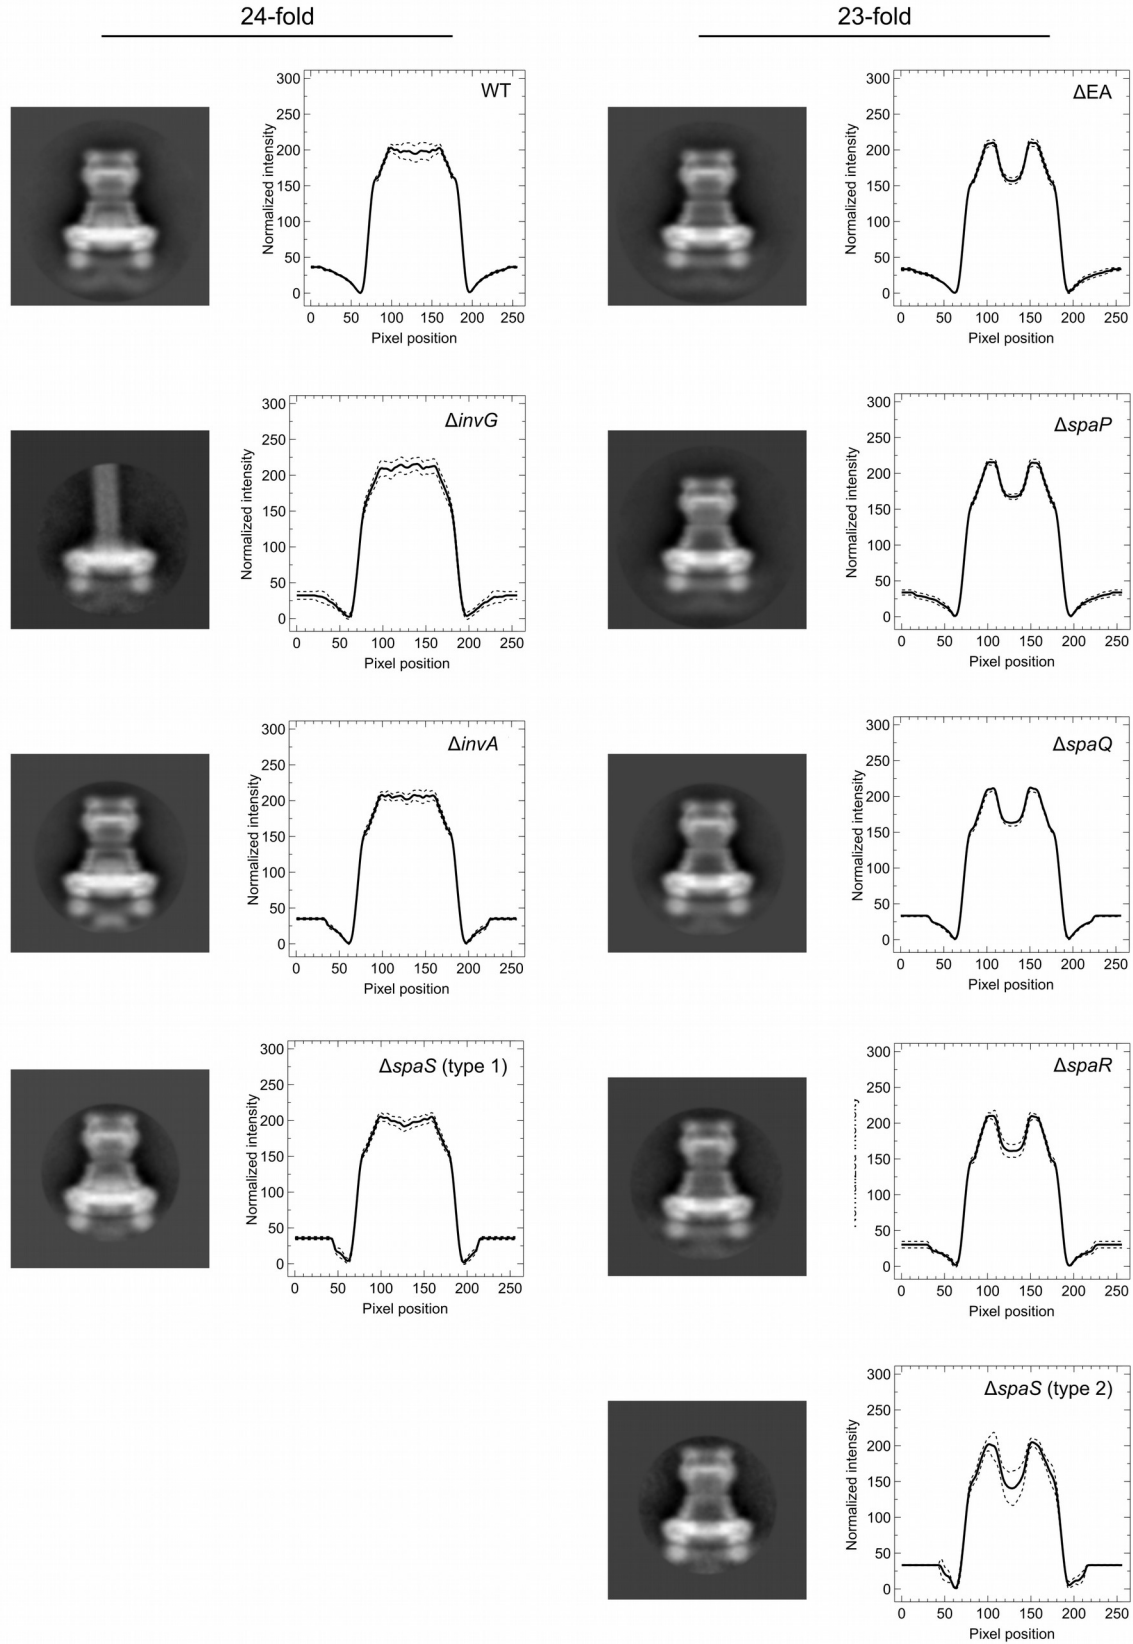

298 **Supplementary Figure 1: T3SS-complexes from WT and mutant strains display**  
299 **different IR diameters**

300 Two-dimensional class averages from vitrified complexes (WT,  $\Delta EA$ ,  $\Delta invG$ ,  $\Delta invA$ ,  
301  $\Delta spaS$ ,  $\Delta spaP$ ,  $\Delta spaQ$ ,  $\Delta spaR$ ) and density profile along IR. Diameters were measured as  
302 the distance of the two lowest minima along the density profile (dashed lines: standard  
303 deviation) and summarized in Supplementary Table 1.

304

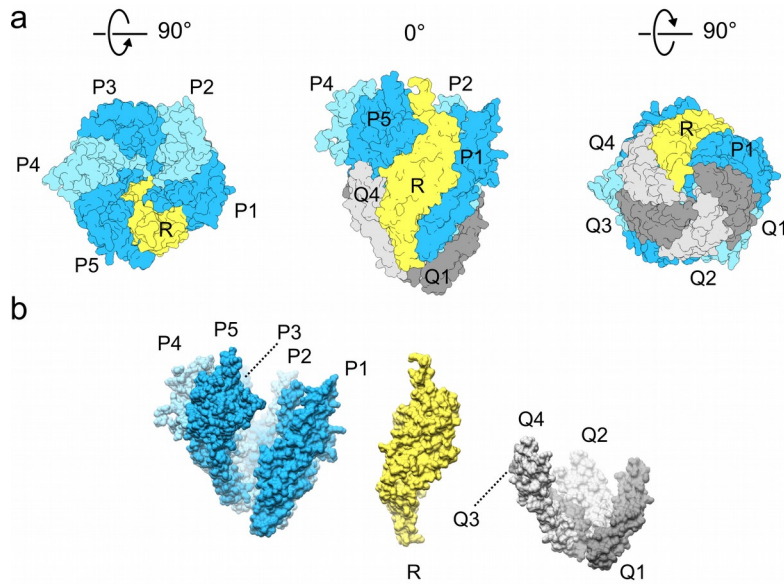

305

306 **Supplementary Figure 2: The PQR complex adopts a pseudo-helical assembly.**

307 a) Surface views from the PQR complex at different orientations (top, side, bottom).

308 Proteins are colored according to their identity (SpaP: blue; SpaR: yellow, SpaQ: grey)

309 b) Surface views of the pseudo-helical packing of the individual SpaP-group, SpaR, and

310 SpaQ-group. SpaQ resembles the bottom of the PQR complex, whereas the SpaP group is

311 arranged at the top-rim of the complex

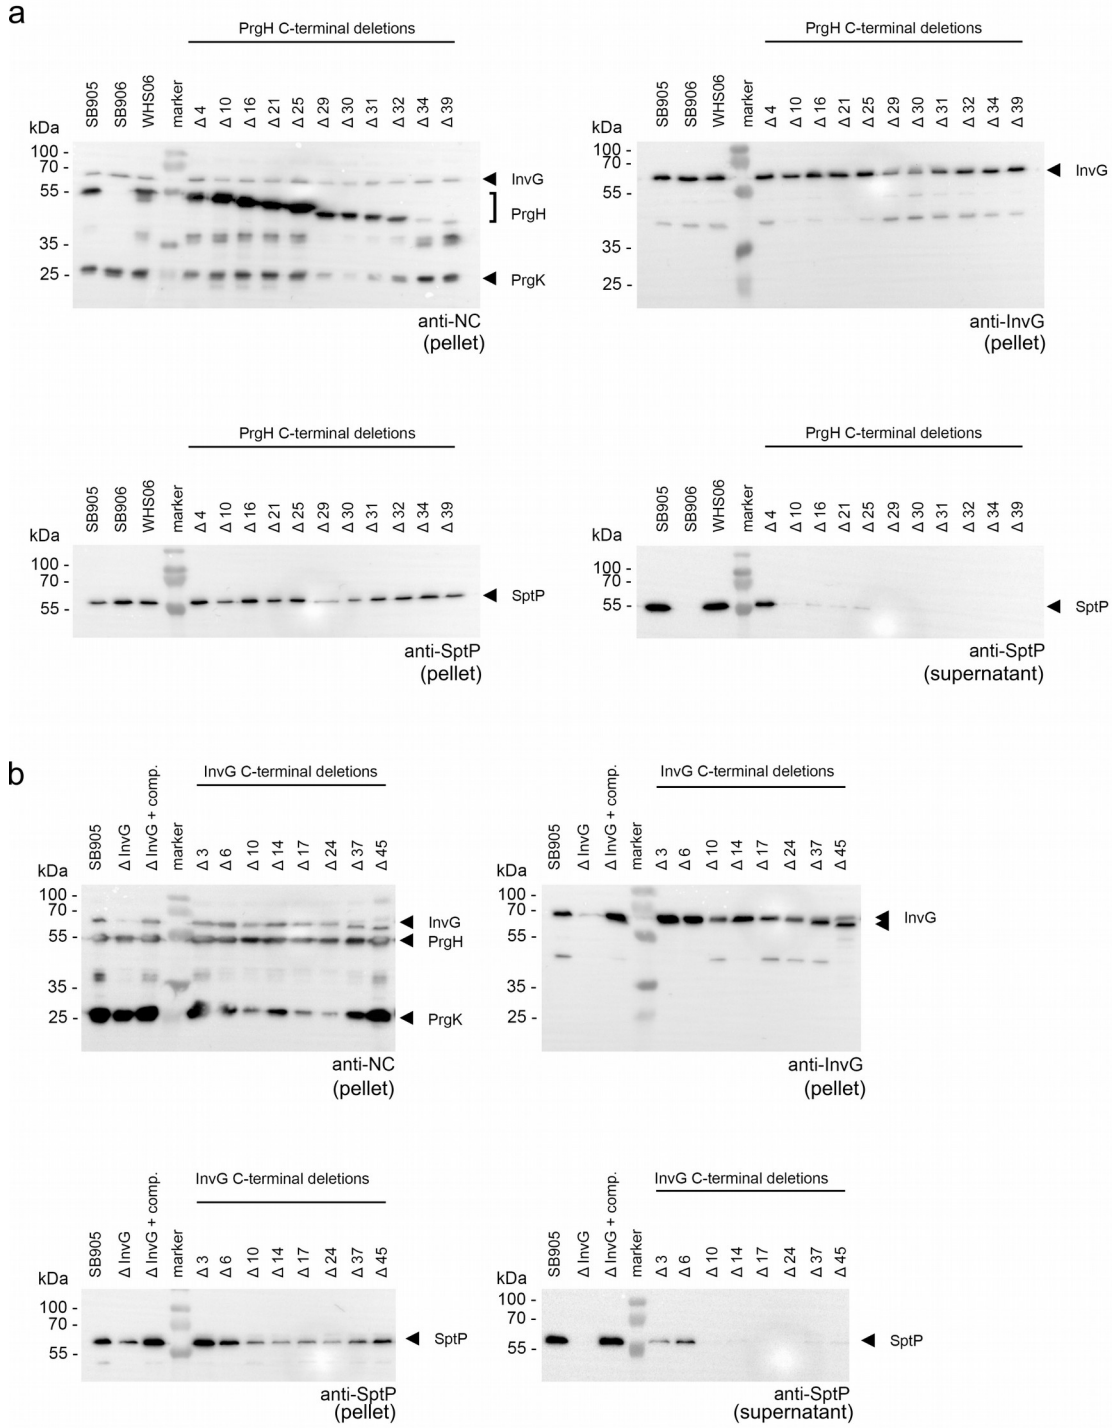

312



313 **Supplementary Figure 3: C-terminal truncations of PrgH or InvG impair T3SS**

314 **function.**

315 a) Secretion assays for C-terminal PrgH truncations. Deletions of four amino acids do  
316 not, and more than 10 amino acids render the T3SS non-functional. Left/top: Detection of  
317 needle complex components (NC) in cell pellets, Top/right: Detection of InvG in PrgH-  
318 truncated cells; Bottom/left: Detection of late T3SS-substrate SptP in cell pellets. Bottom/  
319 right: Detection of secreted late T3SS-substrate SptP in cell culture supernatants. (WT:  
320 SB905, SB906:  $\Delta prgH$ , WHS06:  $\Delta prgH$  (SB906), complemented with plasmid-borne WT  
321 *prgH*),  $\Delta 4\text{-}\Delta 39$ :  $\Delta prgH$  (SB906) complemented with plasmid-borne C-terminal PrgH  
322 deletions; anti-NC (anti needle complex antibody).

323 b) Secretion assay for C-terminal InvG truncations. Deletions of six amino acids do not,  
324 and more than 10 amino acids render T3SS non-functional. Left/top: Detection of needle  
325 complex components (NC) in cell pellets, Top/right: Detection of InvG and truncated  
326 InvG in cells; Bottom/left: Detection of late T3SS-substrate SptP in cell pellets.  
327 Bottom/right: Detection of secreted late T3SS-substrate SptP in cell culture supernatants.  
328 (WT: SB905,  $\Delta invG$ : SB908,  $\Delta InvG$  + comp.: SB908 complemented with plasmid-borne  
329 WT *invG*,  $\Delta 3\text{-}\Delta 45$ :  $\Delta invG$  complemented with plasmid-borne C-terminal InvG deletions;  
330 anti-NC (anti needle complex antibody).

331

332

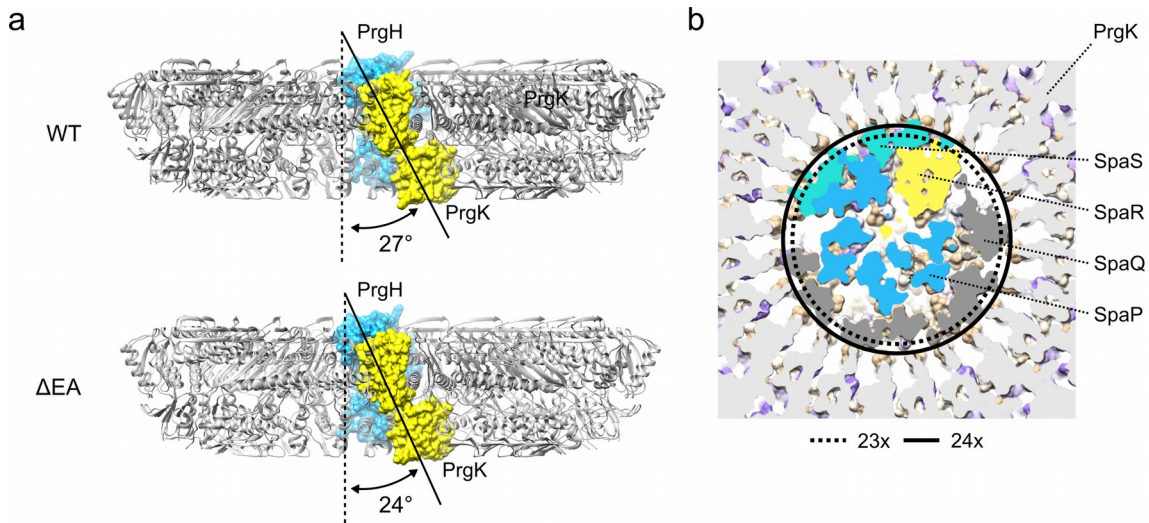

333

#### 334 **Supplementary Figure 4: The dead-end injectisome assembly**

335 a) PrgH and PrgK engage in a similar intertwined packing to form the IR in WT and ΔEA  
336 complexes. PrgH (blue, one protomer) is oriented perpendicular relative to the IR,  
337 whereas PrgK (yellow, one protomer) binds to the PrgH-ring at an angle between 24  
338 (ΔEA) and 27°. (WT). In this view, the upper PrgK domain binds to PrgH shown in blue;  
339 the lower PrgK domain binds to the neighboring PrgH protomer (+1).

340 b) The PQR complex does not fit into a 23-mer complex, and provides a structural  
341 template for the WT 24-mer IR. Inner circle defined by the 24-mer WT complex  
342 (continuous line) and the 23-mer ΔEA complex (dashed line). Surface view through IR,  
343 SpaP (blue), SpaR (yellow), SpaQ (dark grey), SpaS (green). The surface of PrgK is  
344 colored according to hydrophobicity (see also Figure 2), and the section depicted in light  
345 grey.

346

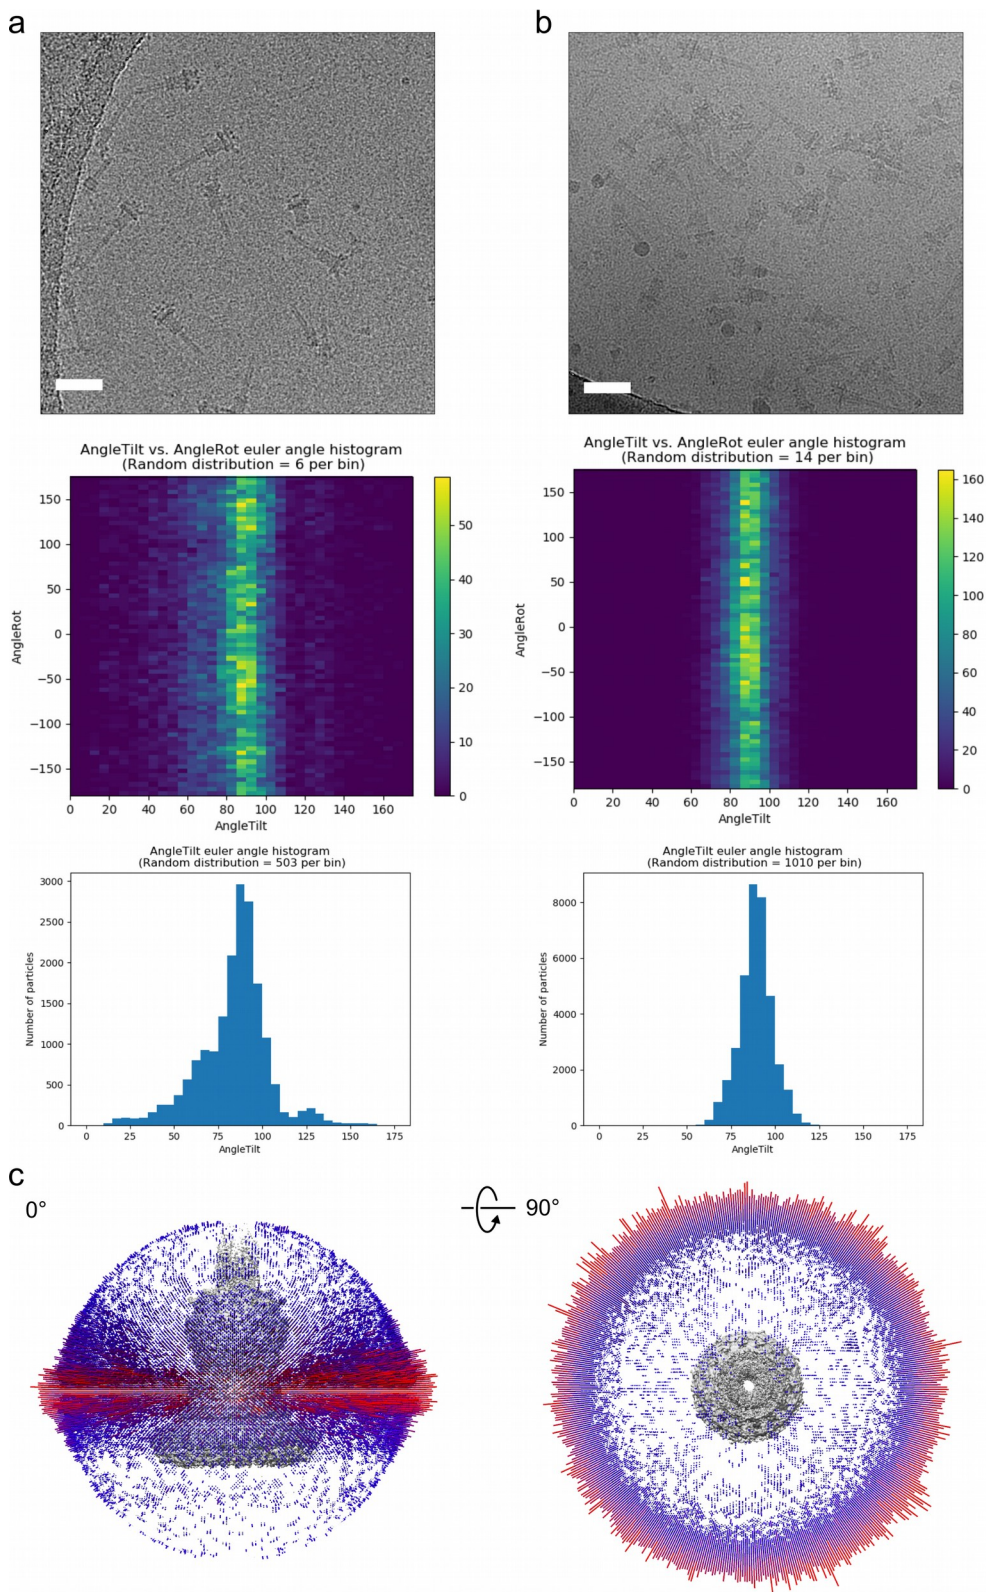

347

348 **Supplementary Figure 5: Grid support type affects needle complex particle**

349 **distribution in cryo electron microscopy**

350 a) Exemplary data for needle complexes vitrified on grids containing a graphene oxide  
351 support layer. Top: Cryo electron micrograph (5-fold binned and 25 Å low-pass filtered in  
352 Relion), scale bar 50 nm. Middle: Histograms of Euler angle distribution (Rot and Tilt) of  
353 asymmetric 3D refinement created using the `plot_indivEuler_histogram_fromStarFile.py`  
354 (Michael A. Cianfrocco, U. Michigan) and histogram of Euler angle distribution (Tilt).

355 b) Same as in (a), yet for continuous carbon grids.

356 c) Angular distribution of C1 reconstruction (job373) of the sub-dataset focusing on the  
357 WT export apparatus complex. Distribution shown from the side and rotated 90° along  
358 the x-axis. Lighter colors (magenta) indicate a higher number of particles found with the  
359 respective tilt angle.



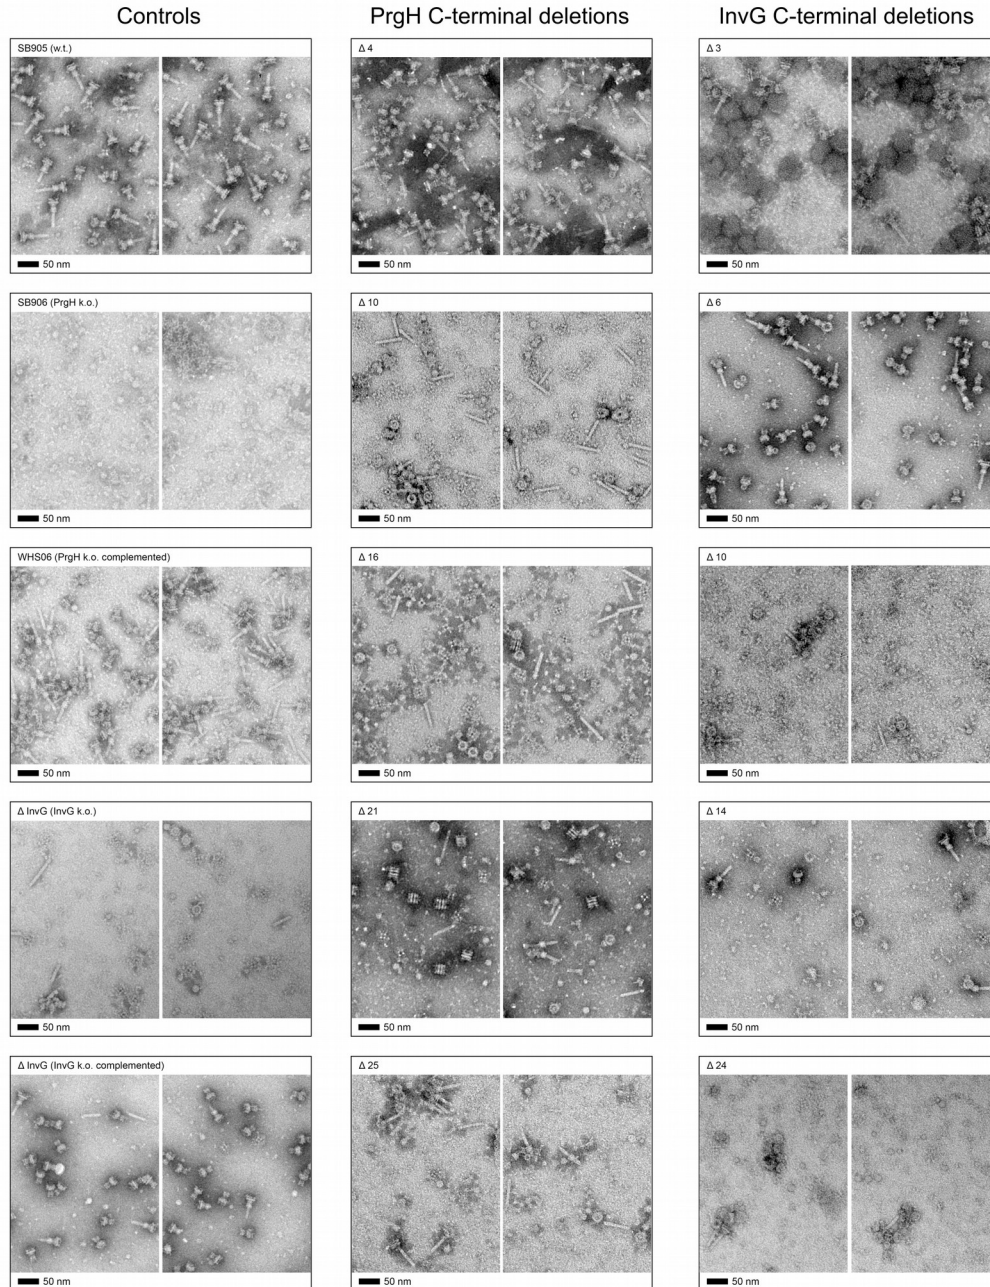

360

361 **Supplementary Figure 6: Stability of T3SS needle complexes is impaired by C-**  
362 **terminal PrgH or InvG truncations.**

363 Representative images of isolated complexes from WT,  $\Delta prgH$ ,  $\Delta invG$  and plasmid-

364 complemented strains. Plasmid-borne truncated versions of PrgH and InvG are indicated.

365 (Middle) PrgH C-terminal deletions –  $\Delta$ 4, 10, 16, 21 and 25; (Right) InvG C-terminal

366 deletions –  $\Delta$ 3, 6, 10, 14 and 24; Scale bar 50 nm.

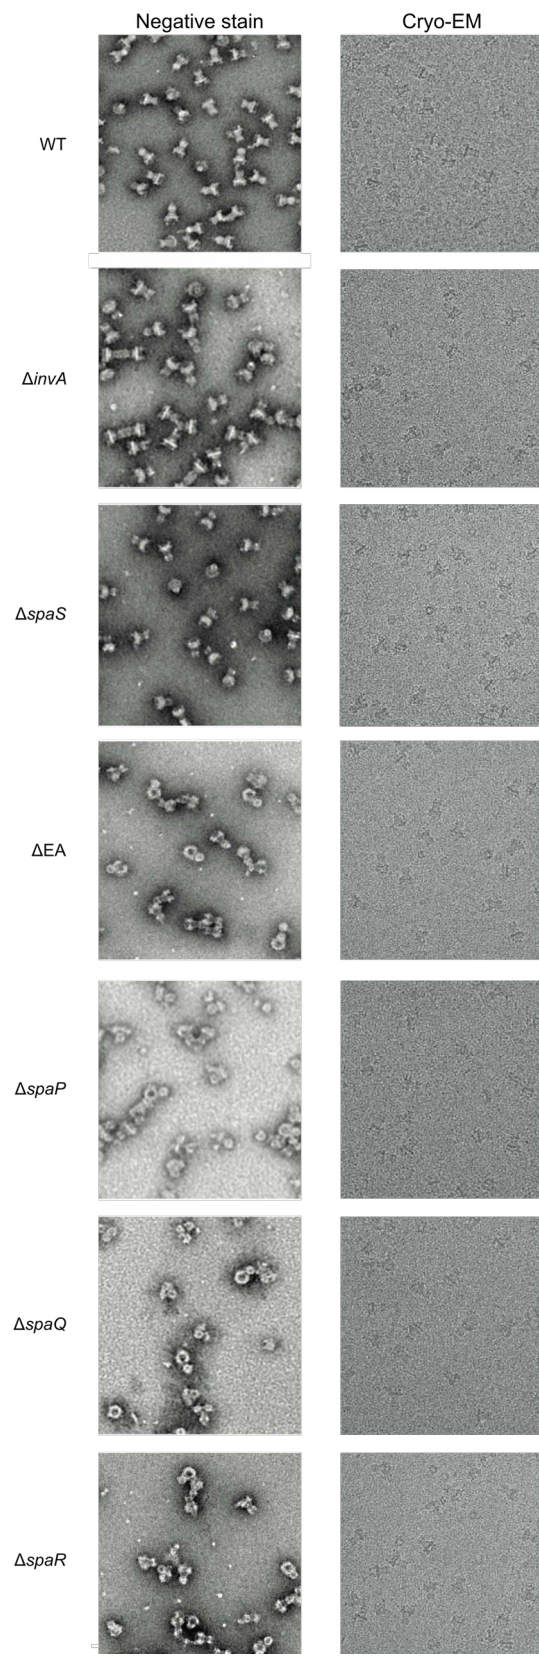

368 **Supplementary Figure 7: Export apparatus knock-out basal-bodies are unstable in**  
369 **negative-stain EM**

370 Isolated complexes from a strain lacking the entire export apparatus proteins ( $\Delta$ EA:  
371  $\Delta$ (*spaP*, *spaQ*, *spaR*, *spaS*, *invA*)), and the individual genes for *spaP*, *spaQ*, *spaR* are  
372 sensitive to structural disruption upon negative stain electron microscopy, likely through  
373 shear forces during the staining procedure. However, the same samples withstand  
374 vitrification for cryo electron microscopy.



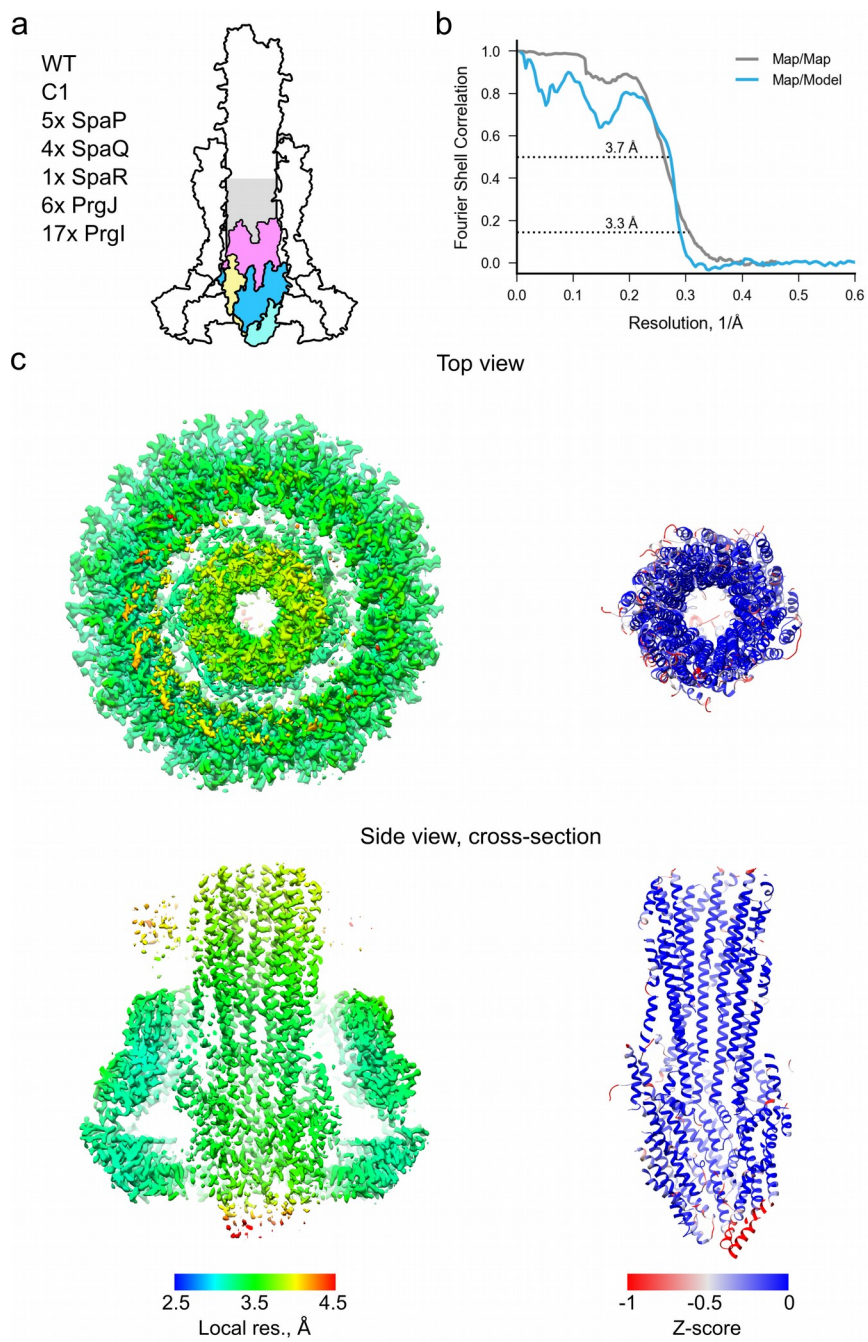

376 **Supplementary Figure 8: Summary for asymmetric reconstruction of WT export**

377 **apparatus**

378 a) Schematic showing the location of the complex in inside the needle complex

379 b) Fourier-shell correlation plots of the: map versus map (grey) and map versus model

380 (blue). The resolution at the respective cut-off is given.

381 c) Left: post-processed electron density map, colored by local resolution (Relion

382 implementation); right: ribbon view of the model colored by Rosetta Z-score

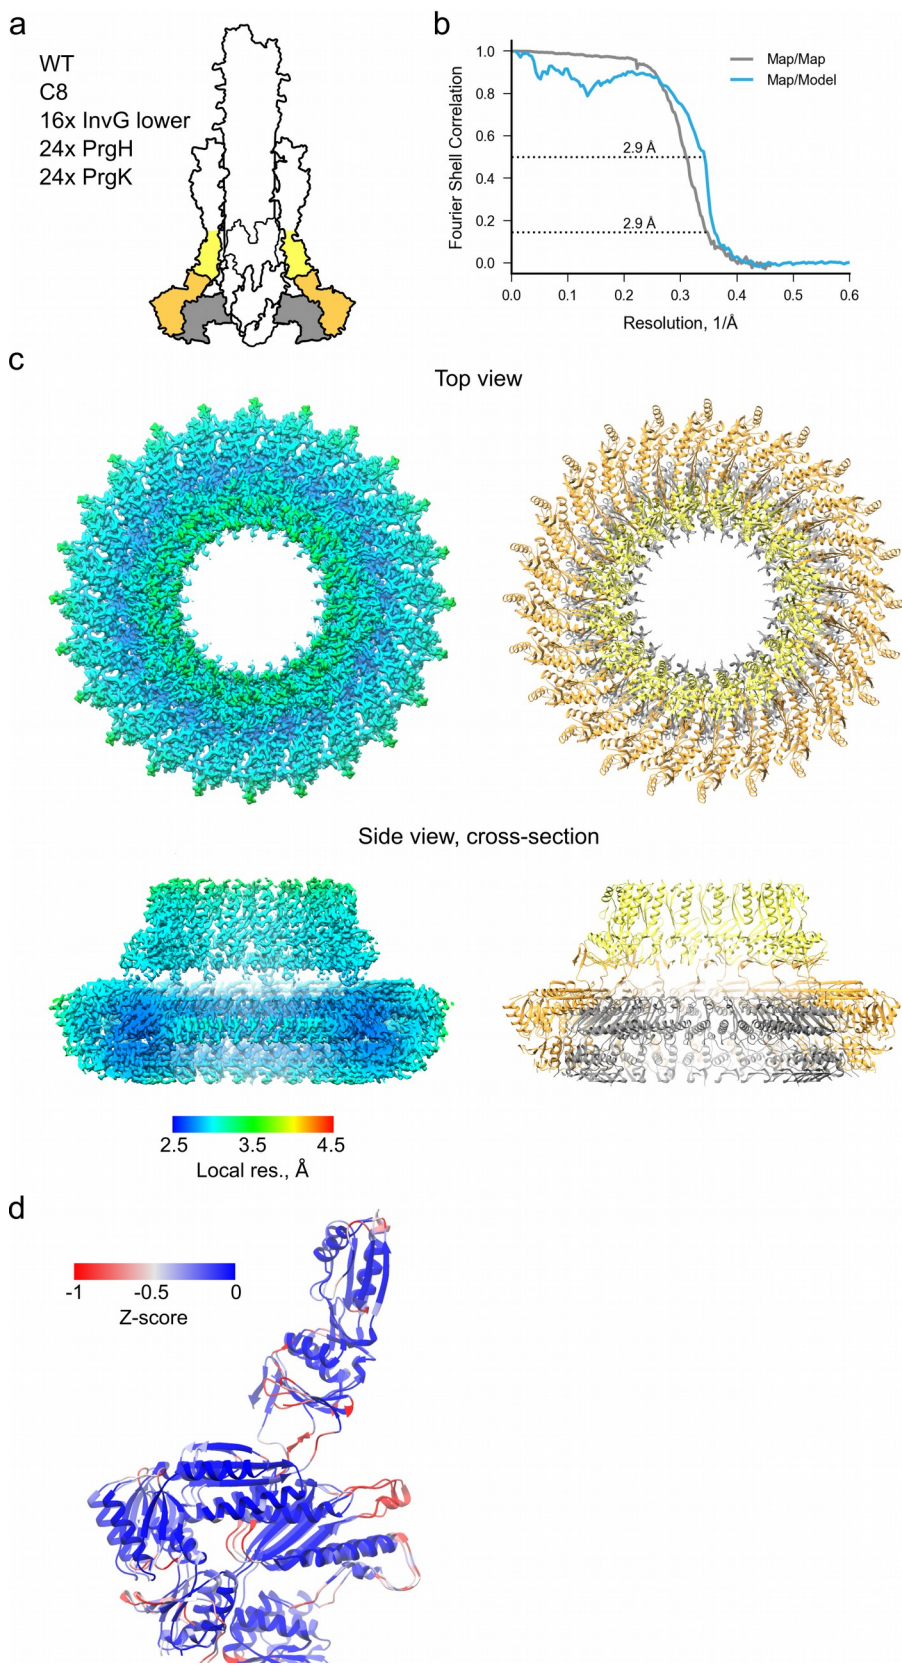

384 **Supplementary Figure 9: Summary for C8 reconstruction of WT IR and OR lower**  
385 **region**

386 a) Schematic showing the location of the complex in inside the needle complex

387 b) Fourier-shell correlation plots of the: map versus map (grey) and map versus model  
388 (blue). The resolution at the respective cut-off is given.

389 c) Left: post-processed electron density map, colored by local resolution (Relion  
390 implementation); right: ribbon view of the model

391 d) An asymmetric unit in ribbon view colored by Rosetta Z-score



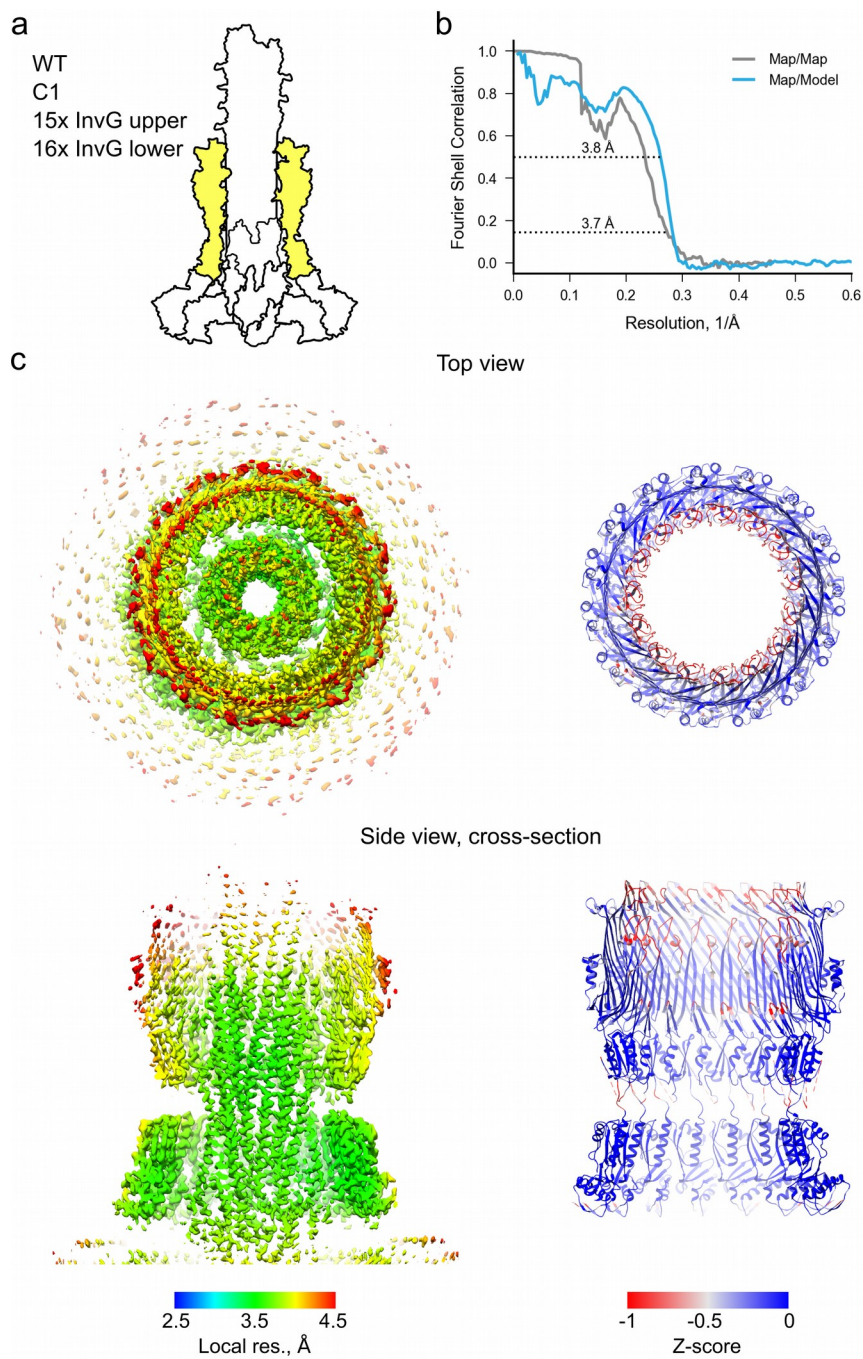

393 **Supplementary Figure 10: Summary for asymmetric reconstruction of WT OR**

394 a) Schematic showing the location of the complex in inside the needle complex

395 b) Fourier-shell correlation plots of the: map versus map (grey) and map versus model

396 (blue). The resolution at the respective cut-off is given.

397 c) Left: post-processed electron density map, colored by local resolution (Relion

398 implementation); right: ribbon view of the model colored by Rosetta Z-score

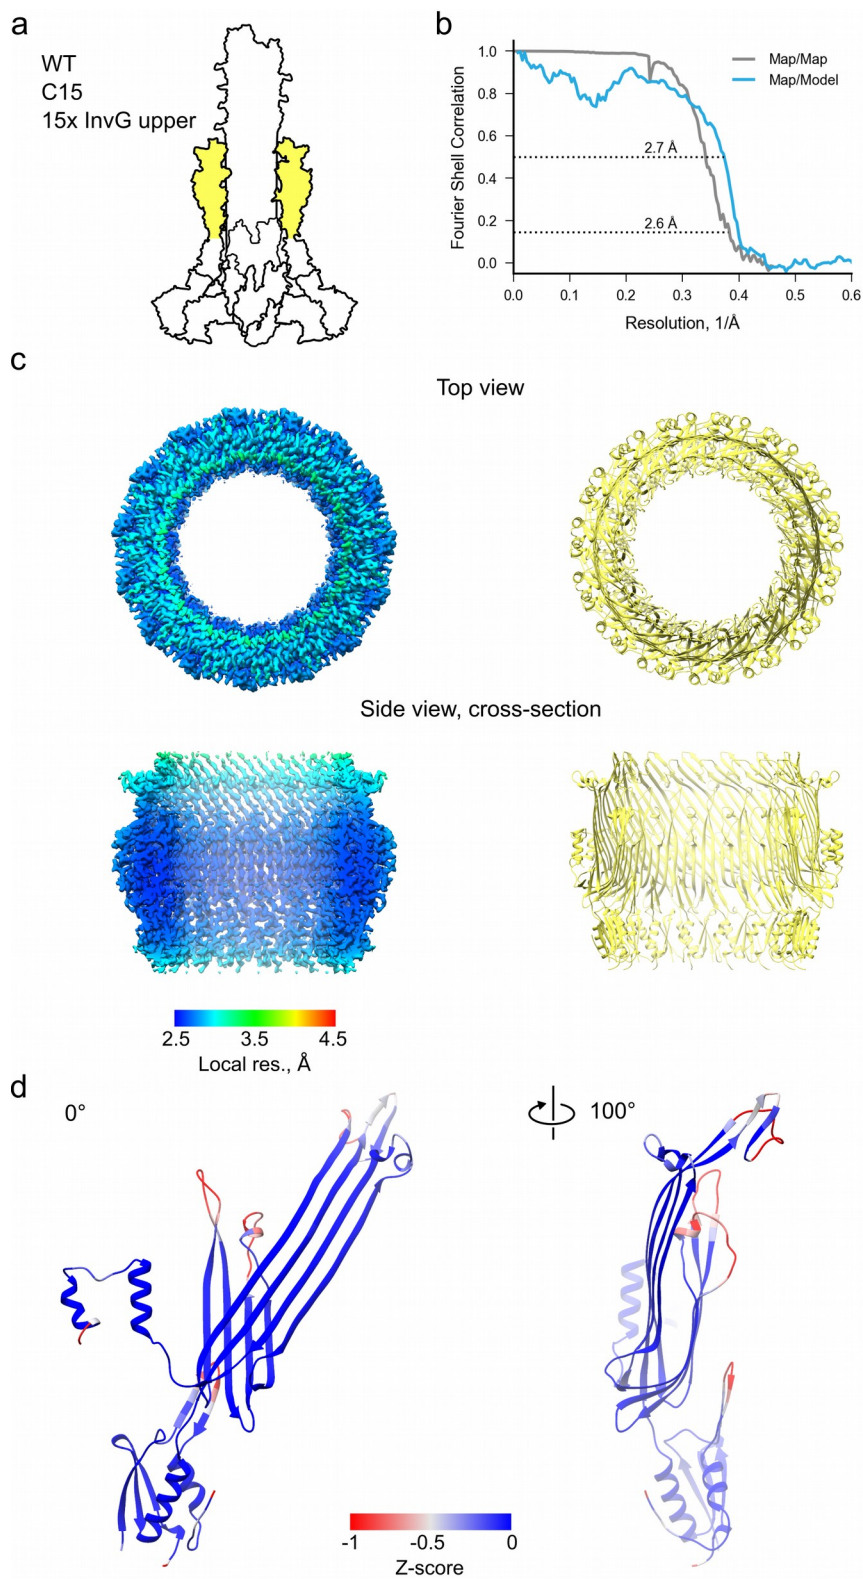

400 **Supplementary Figure 11: Summary for C15 reconstruction of WT InvG upper**  
401 **region**

- 402 a) Schematic showing the location of the complex in inside the needle complex
- 403 b) Fourier-shell correlation plots of the: map versus map (grey) and map versus model  
404 (blue). The resolution at the respective cut-off is given.
- 405 c) Left: post-processed electron density map, colored by local resolution (Relion  
406 implementation); right: ribbon view of the model
- 407 d) An asymmetric unit in ribbon view colored by Rosetta Z-score



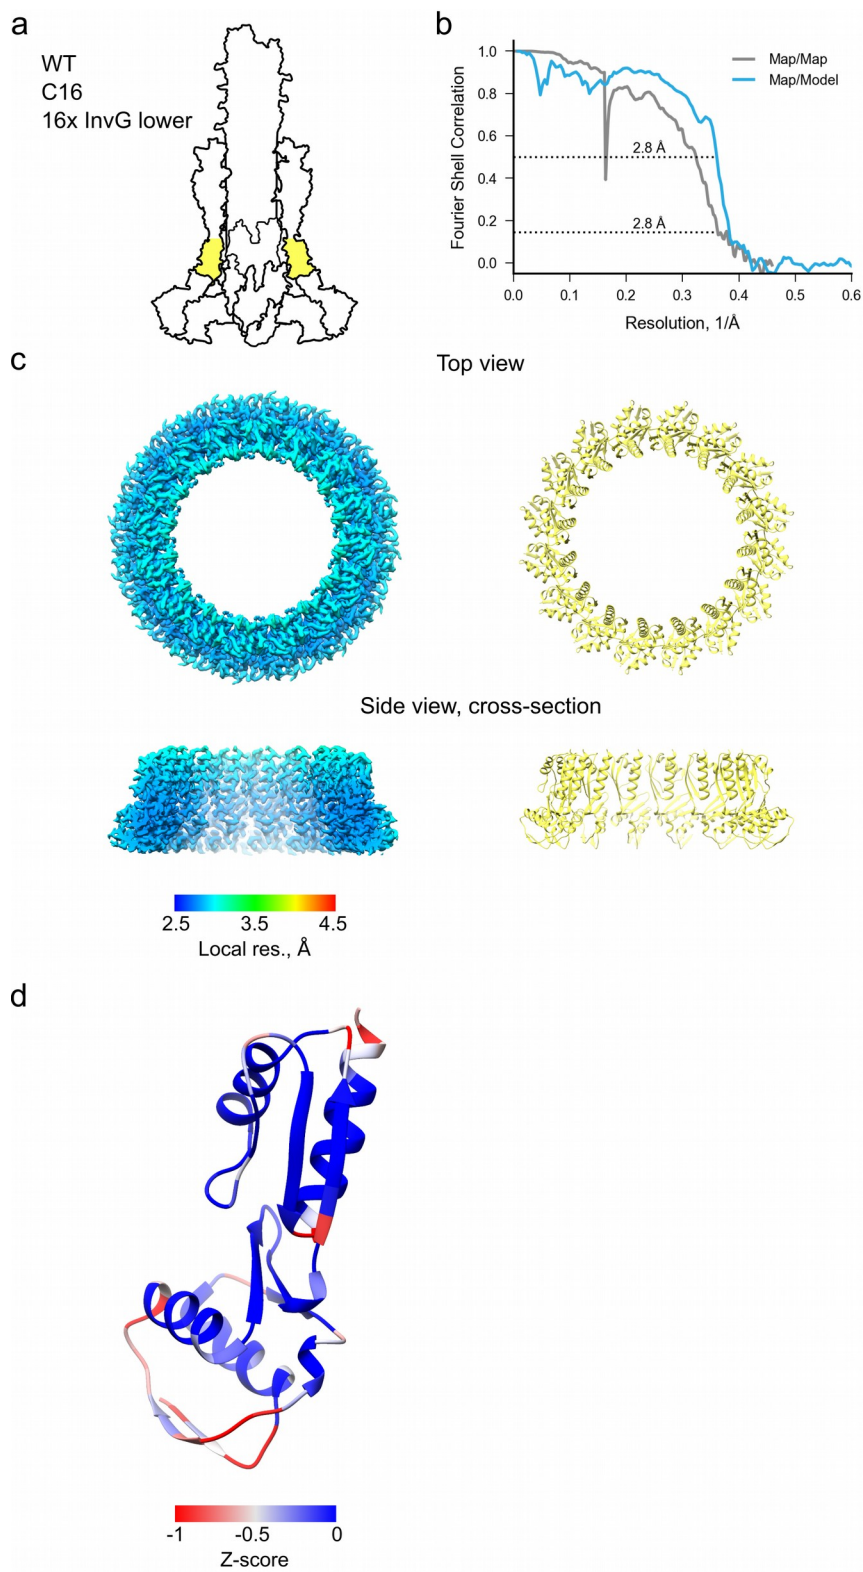

409 **Supplementary Figure 12: Summary for C16 reconstruction of WT InvG lower**

410 **region**

411 a) Schematic showing the location of the complex in inside the needle complex

412 b) Fourier-shell correlation plots of the: map versus map (grey) and map versus model

413 (blue). The resolution at the respective cut-off is given.

414 c) Left: post-processed electron density map, colored by local resolution (Relion

415 implementation); right: ribbon view of the model

416 d) An asymmetric unit in ribbon view colored by Rosetta Z-score

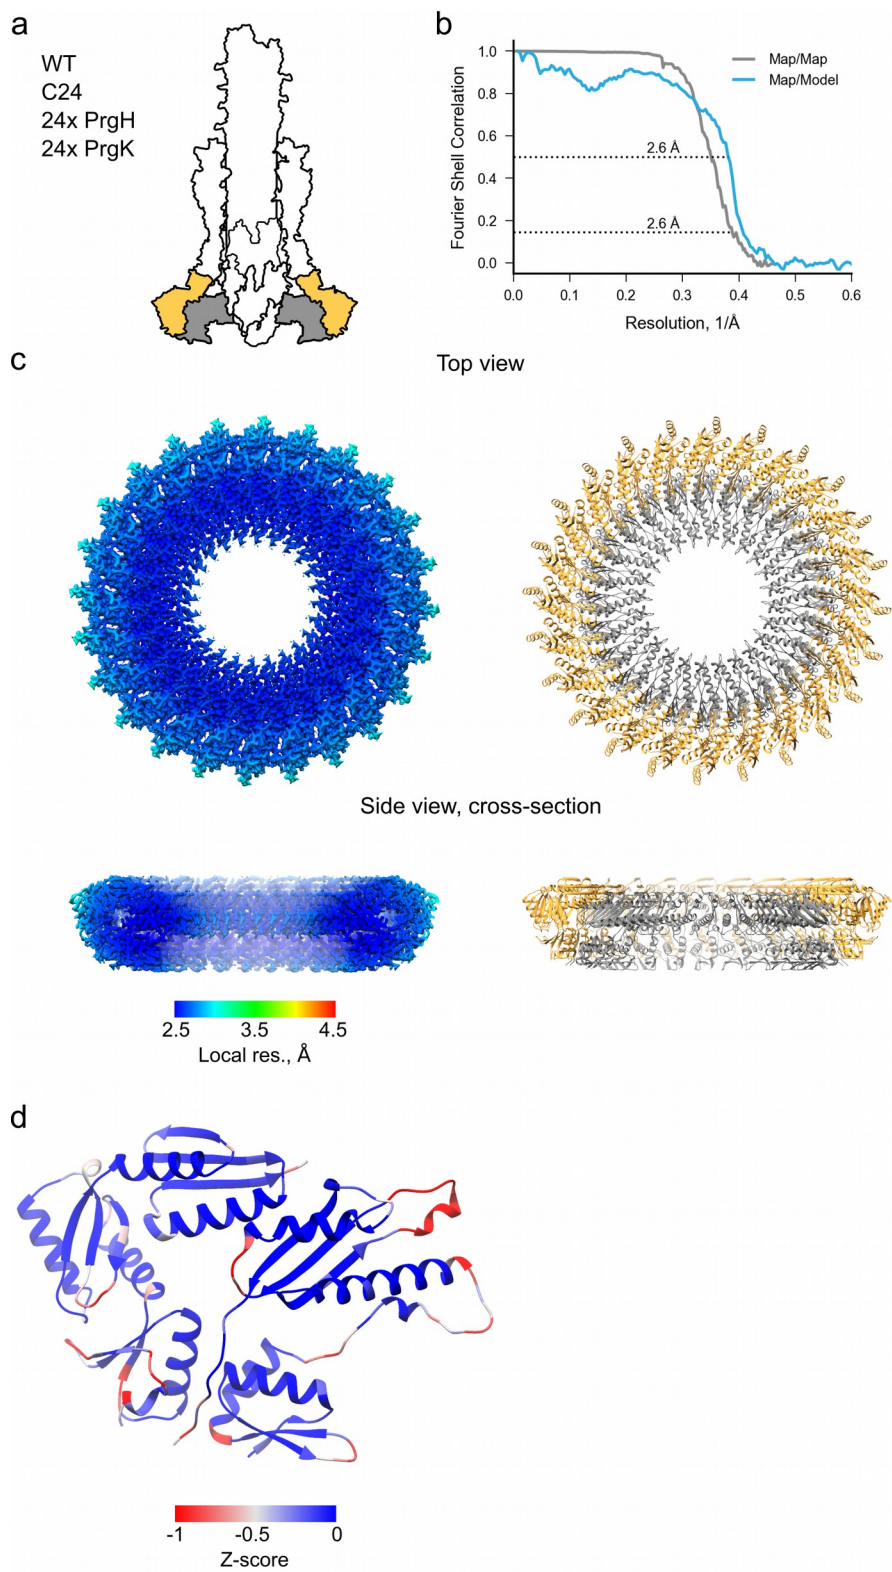

418 **Supplementary Figure 13: Summary for C24 reconstruction of WT IR**

- 419 a) Schematic showing the location of the complex in inside the needle complex
- 420 b) Fourier-shell correlation plots of the: map versus map (grey) and map versus model
- 421 (blue). The resolution at the respective cut-off is given.
- 422 c) Left: post-processed electron density map, colored by local resolution (Relion
- 423 implementation); right: ribbon view of the model
- 424 d) An asymmetric unit in ribbon view colored by Rosetta Z-score

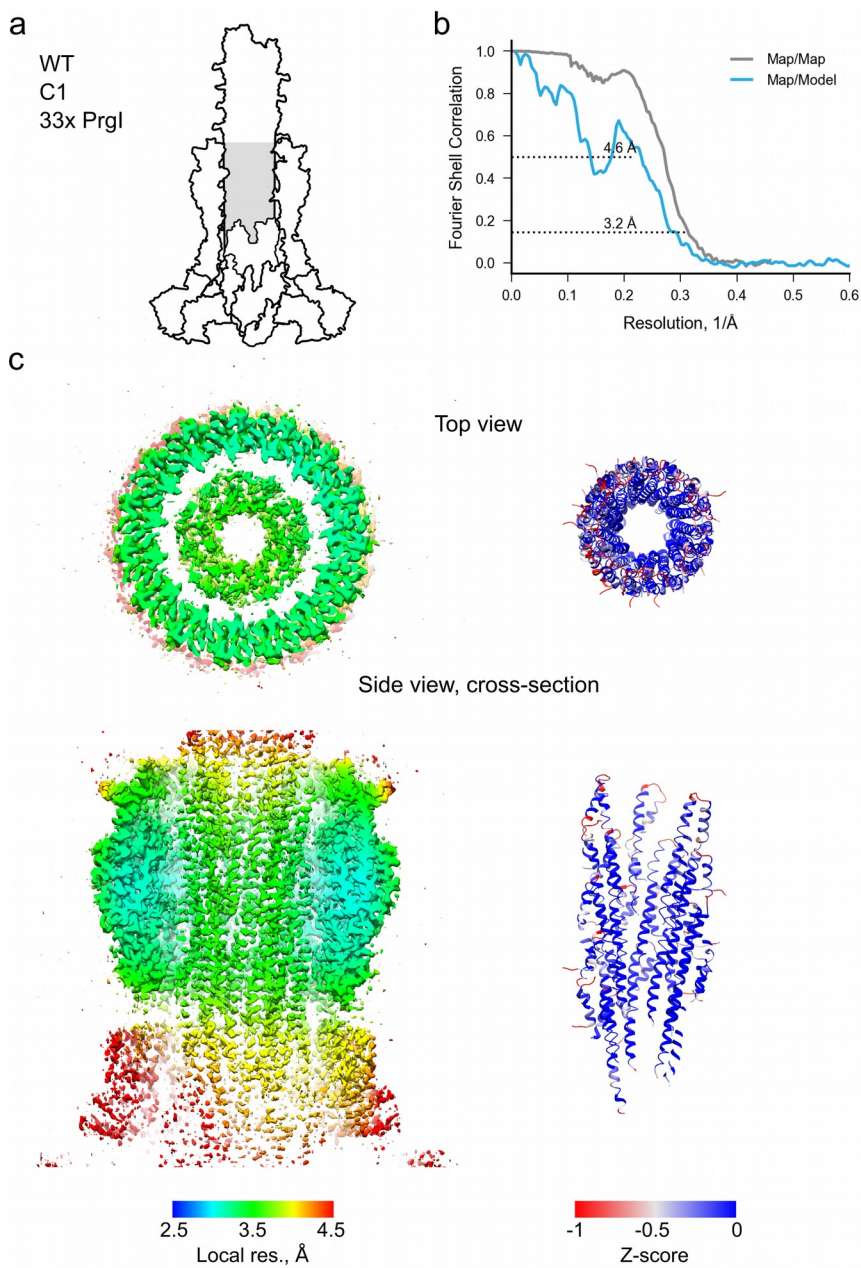

426 **Supplementary Figure 14: Summary for asymmetric reconstruction of WT inner**  
427 **filament part**

- 428 a) Schematic showing the location of the complex in inside the needle complex
- 429 b) Fourier-shell correlation plots of the: map versus map (grey) and map versus model  
430 (blue). The resolution at the respective cut-off is given.
- 431 c) Left: post-processed electron density map, colored by local resolution (Relion  
432 implementation); right: ribbon view of the model colored by Rosetta Z-score



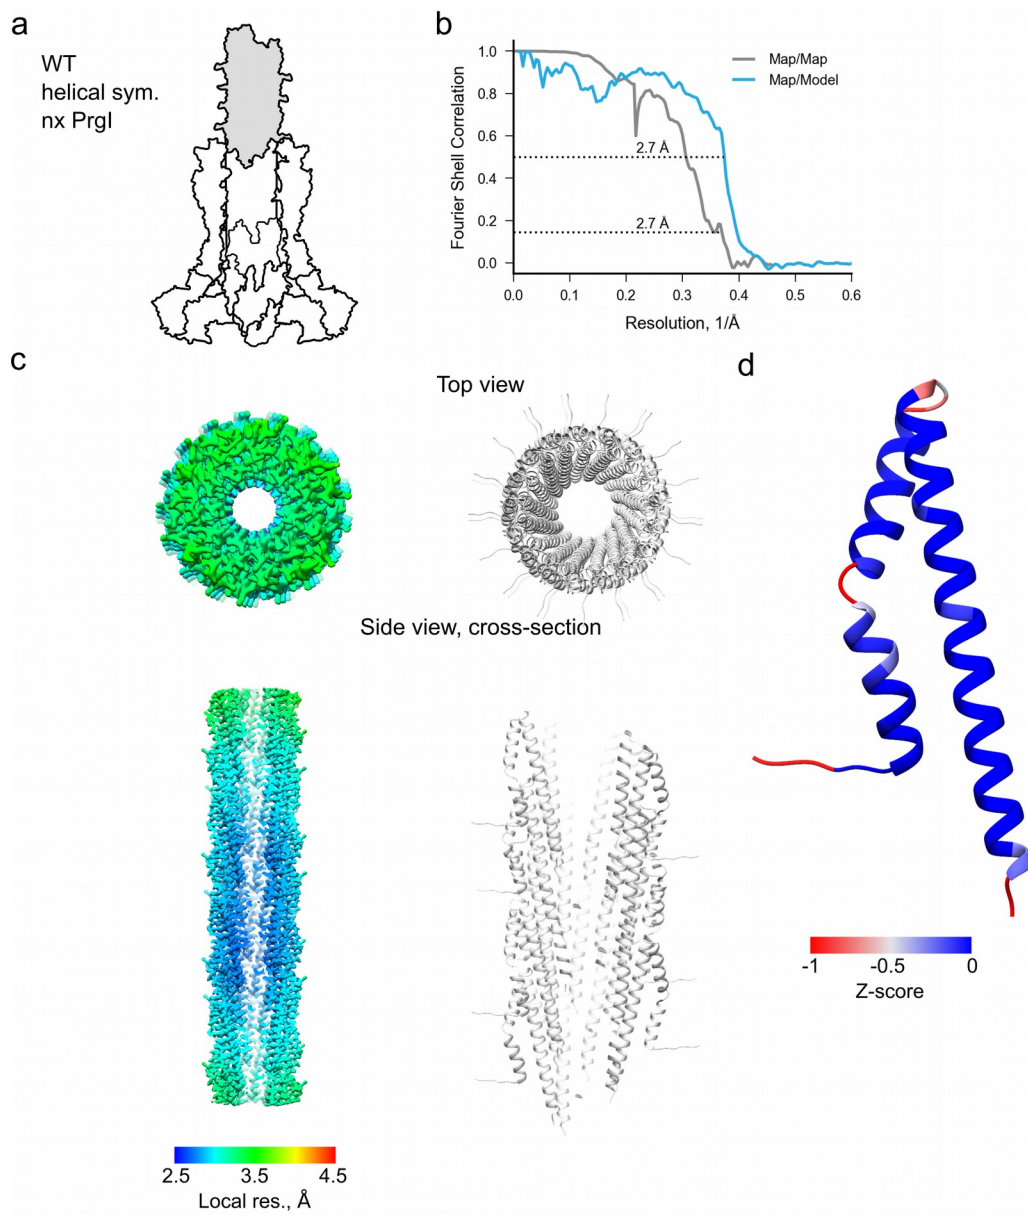

434 **Supplementary Figure 15: Summary for helical reconstruction of WT outer filament**

435 **part**

436 a) Schematic showing the location of the complex in inside the needle complex

437 b) Fourier-shell correlation plots of the: map versus map (grey) and map versus model

438 (blue). The resolution at the respective cut-off is given.

439 c) Left: post-processed electron density map, colored by local resolution (Relion

440 implementation); right: ribbon view of the model

441 d) An asymmetric unit in ribbon view colored by Rosetta Z-score



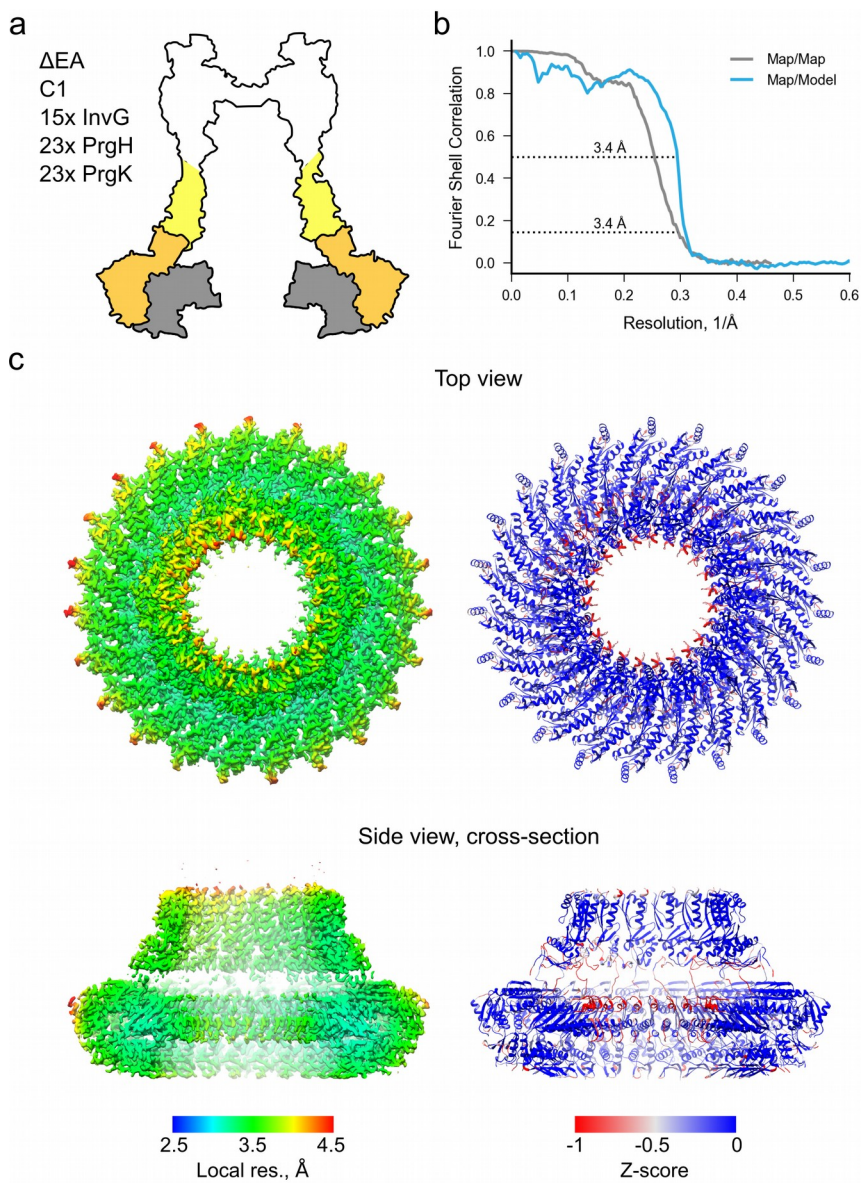

443 **Supplementary Figure 16: Summary for asymmetric reconstruction of  $\Delta$ EA export**

444 **IR and InvG lower region**

445 a) Schematic showing the location of the complex in inside the needle complex

446 b) Fourier-shell correlation plots of the: map versus map (grey) and map versus model

447 (blue). The resolution at the respective cut-off is given.

448 c) Left: post-processed electron density map, colored by local resolution (Relion

449 implementation); right: ribbon view of the model colored by Rosetta Z-score

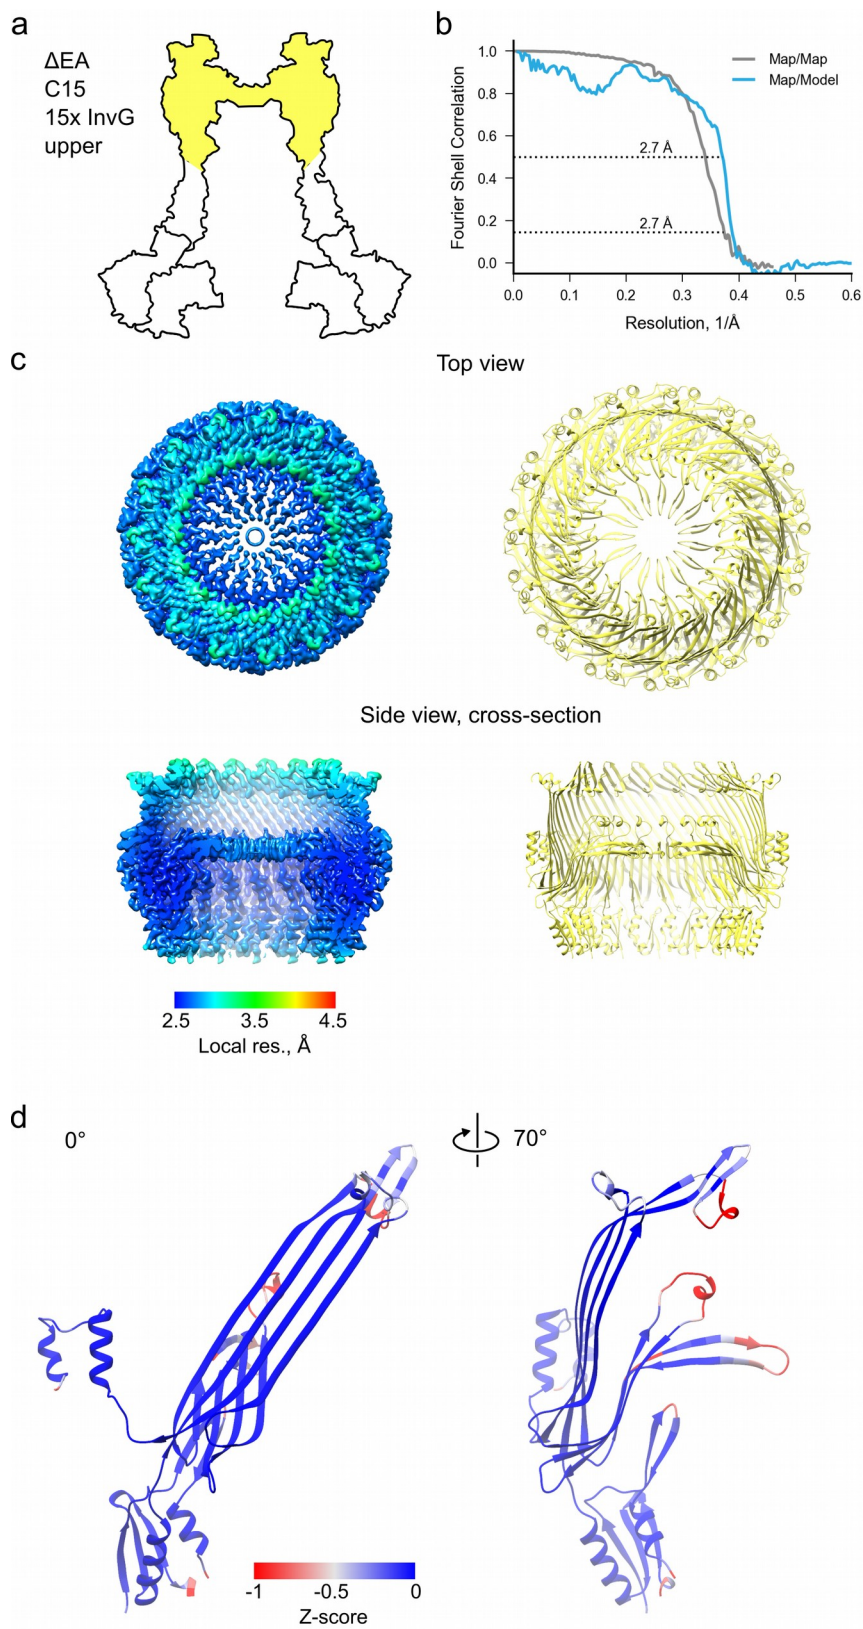

451 **Supplementary Figure 17: Summary for C15 reconstruction of  $\Delta$ EA InvG upper**  
452 **region**

- 453 a) Schematic showing the location of the complex in inside the needle complex
- 454 b) Fourier-shell correlation plots of the: map versus map (grey) and map versus model  
455 (blue). The resolution at the respective cut-off is given.
- 456 c) Left: post-processed electron density map, colored by local resolution (Relion  
457 implementation); right: ribbon view of the model
- 458 d) An asymmetric unit in ribbon view colored by Rosetta Z-score



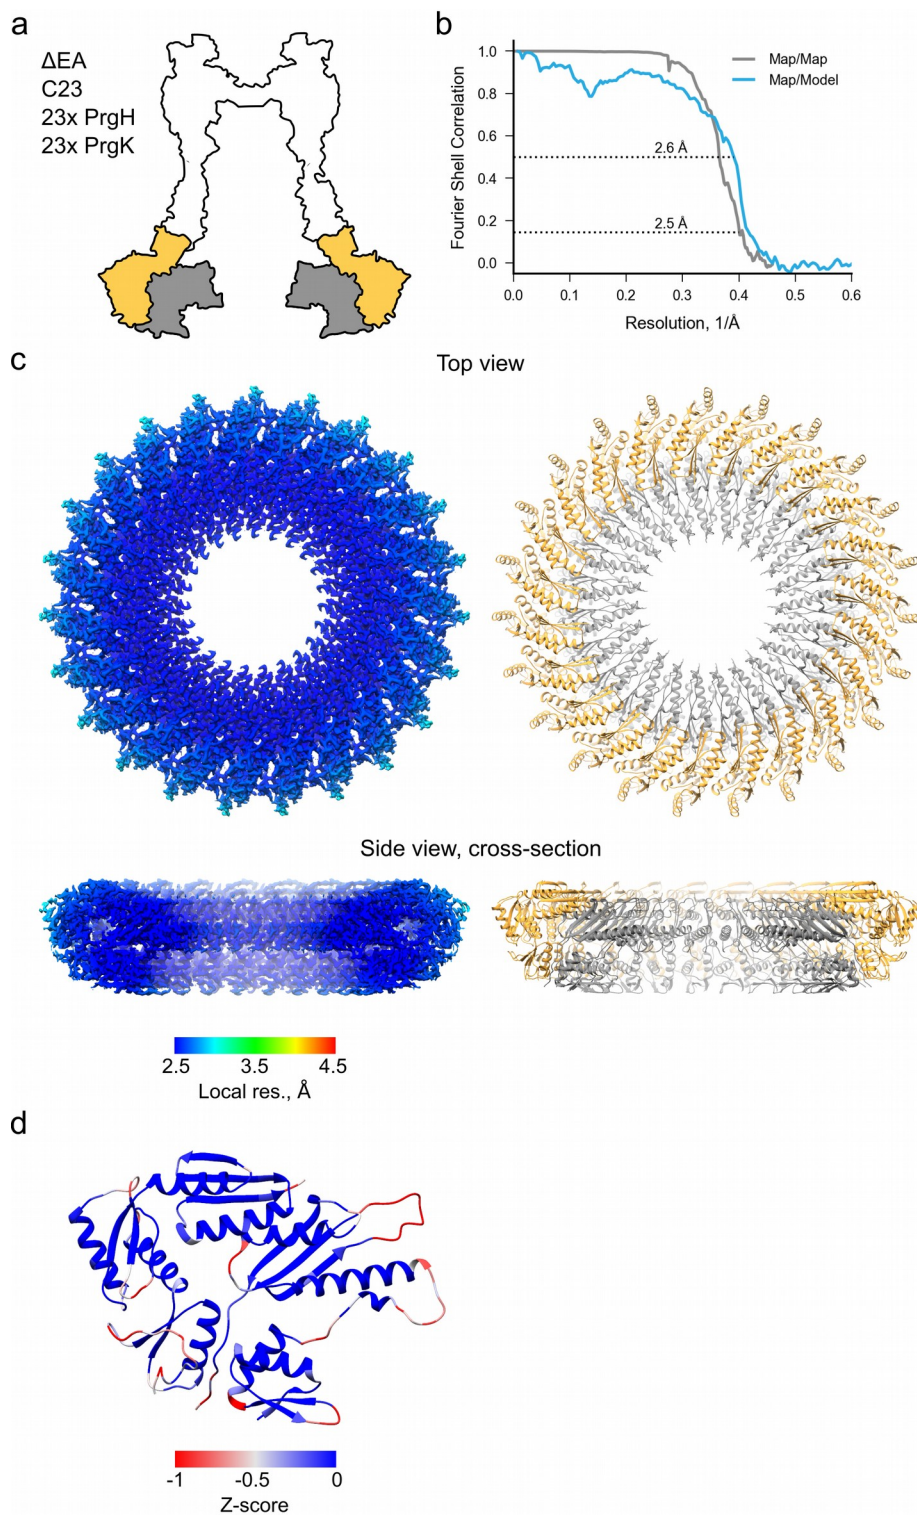

460 **Supplementary Figure 18: Summary for C23 reconstruction of  $\Delta$ EA IR**

- 461 a) Schematic showing the location of the complex in inside the needle complex
- 462 b) Fourier-shell correlation plots of the: map versus map (grey) and map versus model
- 463 (blue). The resolution at the respective cut-off is given.
- 464 c) Left: post-processed electron density map, colored by local resolution (Relion
- 465 implementation); right: ribbon view of the model
- 466 d) An asymmetric unit in ribbon view colored by Rosetta Z-score

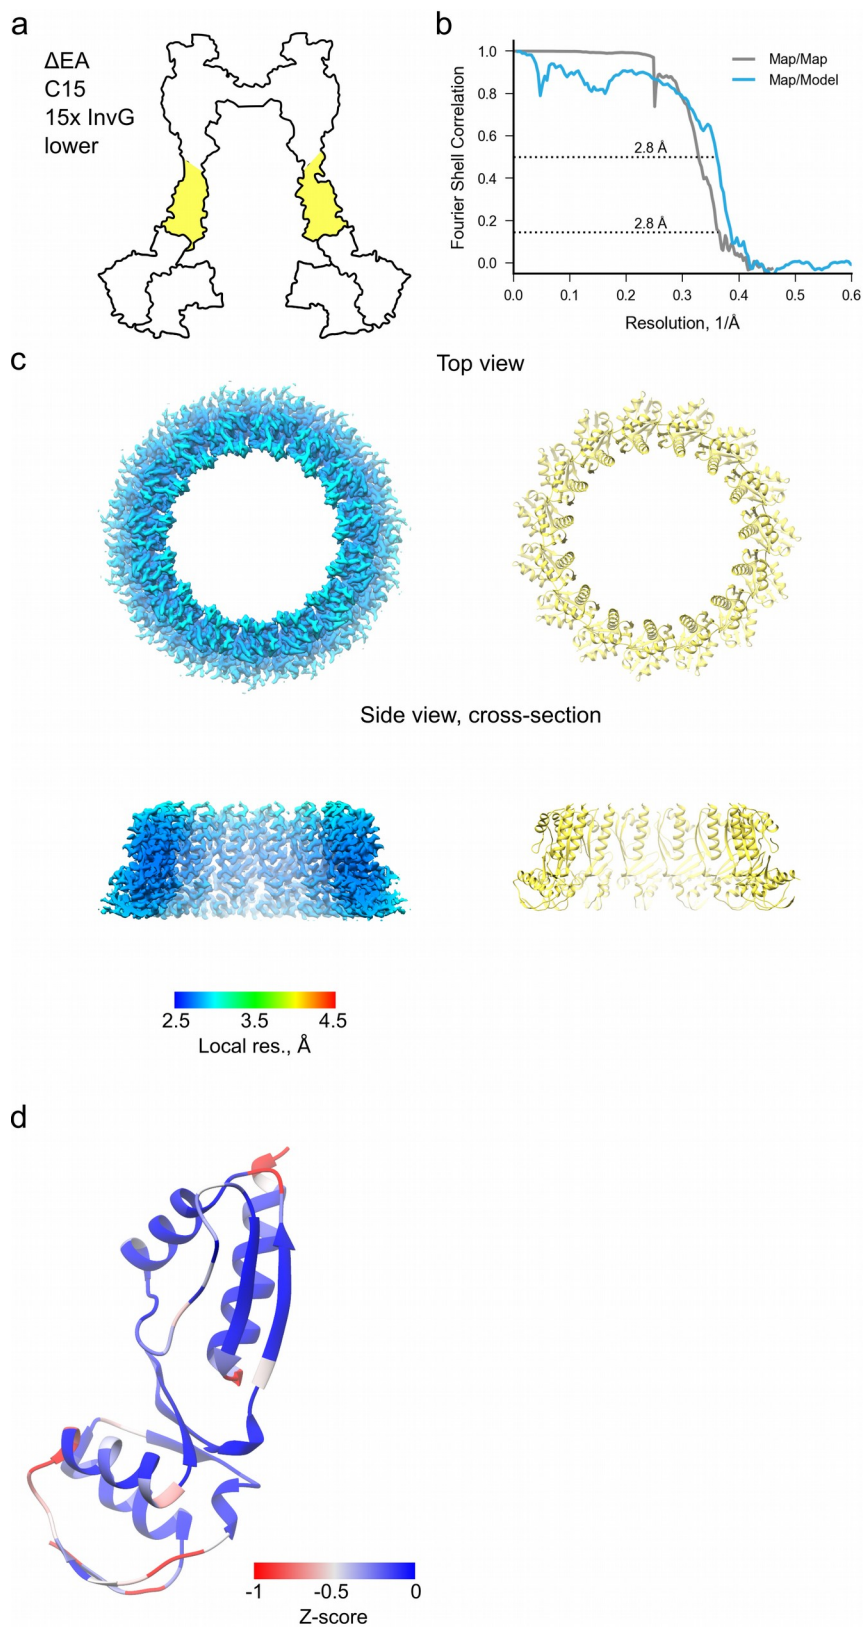

468 **Supplementary Figure 19: Summary for C15 reconstruction of  $\Delta$ EA InvG lower**  
469 **region**

- 470 a) Schematic showing the location of the complex in inside the needle complex
- 471 b) Fourier-shell correlation plots of the: map versus map (grey) and map versus model  
472 (blue). The resolution at the respective cut-off is given.
- 473 c) Left: post-processed electron density map, colored by local resolution (Relion  
474 implementation); right: ribbon view of the model
- 475 d) An asymmetric unit in ribbon view colored by Rosetta Z-score



**Supplementary Table 1: Statistical analysis of IR diameters from 2D class averages**

| Sample                 | n | Diameter, pix | Normality test     | Normality test p-value | Normal distribution | Levene test p-value | Equal variance to WT | t-test p-value | IR oligomericity |
|------------------------|---|---------------|--------------------|------------------------|---------------------|---------------------|----------------------|----------------|------------------|
| WT                     | 8 | 135.88±0.99   | D'Agostino-Pearson | 0.03                   | No                  | -                   | -                    | -              | 24               |
| $\Delta$ EA            | 8 | 132.88±1.55   | D'Agostino-Pearson | 0.59                   | Yes                 | 0.25                | Yes                  | 0.0004         | 23               |
| $\Delta$ spaP          | 8 | 134.13±0.83   | D'Agostino-Pearson | 0.56                   | Yes                 | 1.00                | Yes                  | 0.0019         | 23               |
| $\Delta$ spaQ          | 8 | 132.38±0.74   | D'Agostino-Pearson | 0.54                   | Yes                 | 0.91                | Yes                  | <0.0001        | 23               |
| $\Delta$ spaR          | 8 | 132.38±0.92   | D'Agostino-Pearson | 0.73                   | Yes                 | 0.84                | Yes                  | <0.0001        | 23               |
| $\Delta$ invG          | 8 | 137±1.51      | D'Agostino-Pearson | 0.21                   | Yes                 | 0.46                | Yes                  | 0.1002         | 24               |
| $\Delta$ invA          | 8 | 136.63±1.19   | D'Agostino-Pearson | 0.19                   | Yes                 | 0.55                | Yes                  | 0.1918         | 24               |
| $\Delta$ spaS (type 1) | 9 | 135.22±1.64   | D'Agostino-Pearson | 0.01                   | No                  | 0.25                | Yes                  | 0.3446         | 24               |
| $\Delta$ spaS (type 2) | 5 | 131.6±1.67    | Shapiro-Wilk       | 0.31                   | Yes                 | 0.18                | Yes                  | 0.0001         | 23               |

Diameter values are given as average  $\pm$  standard deviation from n class averages

For all tests the confidence interval is 95%

**Supplementary Table 2: Evolutionary couplings between T3SS proteins**

| Protein A | Position in A | Protein B | Position in B | EVC Ratio | EVC Coupling Score | EVC Coupling Score Probability | RaptorX Probability | Notes                         |
|-----------|---------------|-----------|---------------|-----------|--------------------|--------------------------------|---------------------|-------------------------------|
| InvG177   |               | PrgH      |               | discrete  |                    |                                |                     |                               |
| InvG177   |               | PrgK      |               | good      |                    |                                |                     |                               |
| PrgH      |               | PrgK      |               | discrete  |                    |                                |                     |                               |
| PrgI      |               | SpaP      |               | good      |                    |                                |                     |                               |
| PrgJ      |               | PrgI      |               | good      |                    |                                |                     |                               |
| PrgJ      | 88            | SpaP      | 12            | discrete  | 0.069921           | 0.80929057013                  |                     |                               |
| SpaP      |               | InvG177   |               | good      |                    |                                |                     |                               |
| SpaP      |               | PrgK      |               | very good |                    |                                |                     |                               |
| SpaP      | 160           | PrgK      | 95            |           |                    |                                | 0.639075            |                               |
| SpaP      | 160           | PrgK      | 94            |           |                    |                                | 0.600327            |                               |
| SpaP      | 157           | PrgK      | 95            |           |                    |                                | 0.574201            |                               |
| SpaQ      |               | PrgK      |               | very good |                    |                                |                     |                               |
| SpaS      |               | PrgK      |               | very good |                    |                                |                     |                               |
| SpaS      |               | SpaP      |               | very good |                    |                                |                     |                               |
| SpaS      | 123           | SpaQ      | 39            | very good | 0.228503           | 0.99999646681                  | 0.81136             | Found in both EVC and RaptorX |
| SpaS      | 117           | SpaQ      | 38            | very good | 0.140312           | 0.95004729629                  | 0.752302            | Found in both EVC and RaptorX |
| SpaS      | 105           | SpaQ      | 39            | very good | 0.129688           | 0.88339858147                  |                     |                               |
| SpaS      | 135           | SpaQ      | 39            | very good | 0.186191           | 0.99943133179                  |                     |                               |
| SpaS      | 104           | SpaQ      | 41            | very good | 0.15712            | 0.98894493295                  | 0.690507            | Found in both EVC and RaptorX |
| SpaS      | 117           | SpaQ      | 39            |           |                    |                                | 0.881415            |                               |
| SpaS      | 104           | SpaQ      | 38            |           |                    |                                | 0.701592            |                               |
| SpaS      | 119           | SpaQ      | 39            |           |                    |                                | 0.626436            |                               |
| SpaS      | 305           | SpaQ      | 45            |           |                    |                                | 0.624521            |                               |
| SpaS      | 122           | SpaQ      | 39            |           |                    |                                | 0.60804             |                               |
| SpaS      | 118           | SpaQ      | 39            |           |                    |                                | 0.535562            |                               |
| SpaS      | 126           | SpaQ      | 39            |           |                    |                                | 0.531625            |                               |
| SpaS      | 135           | SpaQ      | 39            |           |                    |                                | 0.526511            |                               |
| SpaS      | 86            | SpaQ      | 54            |           |                    |                                | 0.522819            |                               |
| SpaS      | 68            | SpaQ      | 72            |           |                    |                                | 0.503434            |                               |
| SpaS      | 149           | SpaR      | 198           | very good | 0.278174           | 1                              | 0.874956            | Found in both EVC and RaptorX |
| SpaS      | 171           | SpaR      | 186           | very good | 0.36968            | 1                              | 0.916678            | Found in both EVC and RaptorX |
| SpaS      | 171           | SpaR      | 190           | very good | 0.134256           | 0.99950400538                  | 0.729069            | Found in both EVC and RaptorX |
| SpaS      | 179           | SpaR      | 197           | very good | 0.171552           | 0.99999980529                  | 0.915408            | Found in both EVC and RaptorX |
| SpaS      | 179           | SpaR      | 193           | very good | 0.103505           | 0.92697559046                  | 0.69132             | Found in both EVC and RaptorX |
| SpaS      | 182           | SpaR      | 194           | very good | 0.1012             | 0.90099992619                  | 0.775293            | Found in both EVC and RaptorX |
| SpaS      | 163           | SpaR      | 190           | very good | 0.130257           | 0.99897334881                  | 0.666919            | Found in both EVC and RaptorX |
| SpaS      | 175           | SpaR      | 190           | very good | 0.323811           | 1                              | 0.87269             | Found in both EVC and RaptorX |
| SpaS      | 186           | SpaR      | 201           |           |                    |                                | 0.93371             |                               |
| SpaS      | 182           | SpaR      | 197           |           |                    |                                | 0.88573             |                               |
| SpaS      | 164           | SpaR      | 187           |           |                    |                                | 0.876829            |                               |
| SpaS      | 168           | SpaR      | 183           |           |                    |                                | 0.842796            |                               |
| SpaS      | 182           | SpaR      | 198           |           |                    |                                | 0.833507            |                               |
| SpaS      | 168           | SpaR      | 182           |           |                    |                                | 0.831055            |                               |
| SpaS      | 183           | SpaR      | 197           |           |                    |                                | 0.827168            |                               |
| SpaS      | 160           | SpaR      | 190           |           |                    |                                | 0.772297            |                               |
| SpaS      | 163           | SpaR      | 187           |           |                    |                                | 0.766828            |                               |
| SpaS      | 178           | SpaR      | 194           |           |                    |                                | 0.753234            |                               |
| SpaS      | 183           | SpaR      | 201           |           |                    |                                | 0.747192            |                               |
| SpaS      | 160           | SpaR      | 191           |           |                    |                                | 0.73799             |                               |
| SpaS      | 179           | SpaR      | 194           |           |                    |                                | 0.711606            |                               |
| SpaS      | 190           | SpaR      | 205           |           |                    |                                | 0.708529            |                               |
| SpaS      | 153           | SpaR      | 194           |           |                    |                                | 0.704504            |                               |
| SpaS      | 168           | SpaR      | 186           |           |                    |                                | 0.69983             |                               |
| SpaS      | 164           | SpaR      | 183           |           |                    |                                | 0.698627            |                               |
| SpaS      | 166           | SpaR      | 183           |           |                    |                                | 0.691212            |                               |
| SpaS      | 160           | SpaR      | 187           |           |                    |                                | 0.679686            |                               |
| SpaS      | 160           | SpaR      | 194           |           |                    |                                | 0.675681            |                               |
| SpaS      | 186           | SpaR      | 198           |           |                    |                                | 0.666855            |                               |
| SpaS      | 145           | SpaR      | 202           |           |                    |                                | 0.654103            |                               |
| SpaS      | 167           | SpaR      | 183           |           |                    |                                | 0.639143            |                               |
| SpaS      | 164           | SpaR      | 233           |           |                    |                                | 0.623913            |                               |
| SpaS      | 186           | SpaR      | 202           |           |                    |                                | 0.608171            |                               |

|      |     |      |     |  |  |  |          |  |
|------|-----|------|-----|--|--|--|----------|--|
| SpaS | 168 | SpaR | 179 |  |  |  | 0.606976 |  |
| SpaS | 161 | SpaR | 233 |  |  |  | 0.600034 |  |
| SpaS | 164 | SpaR | 237 |  |  |  | 0.599347 |  |
| SpaS | 175 | SpaR | 193 |  |  |  | 0.591811 |  |
| SpaS | 165 | SpaR | 183 |  |  |  | 0.589167 |  |
| SpaS | 153 | SpaR | 198 |  |  |  | 0.582776 |  |
| SpaS | 141 | SpaR | 211 |  |  |  | 0.57742  |  |
| SpaS | 157 | SpaR | 229 |  |  |  | 0.567868 |  |
| SpaS | 182 | SpaR | 201 |  |  |  | 0.566108 |  |
| SpaS | 190 | SpaR | 201 |  |  |  | 0.565288 |  |
| SpaS | 141 | SpaR | 206 |  |  |  | 0.553542 |  |
| SpaS | 164 | SpaR | 234 |  |  |  | 0.542084 |  |
| SpaS | 161 | SpaR | 230 |  |  |  | 0.541381 |  |
| SpaS | 171 | SpaR | 183 |  |  |  | 0.539712 |  |
| SpaS | 164 | SpaR | 184 |  |  |  | 0.538042 |  |
| SpaS | 149 | SpaR | 195 |  |  |  | 0.537265 |  |
| SpaS | 187 | SpaR | 201 |  |  |  | 0.533428 |  |
| SpaS | 164 | SpaR | 190 |  |  |  | 0.523606 |  |
| SpaS | 160 | SpaR | 230 |  |  |  | 0.520204 |  |
| SpaS | 138 | SpaR | 207 |  |  |  | 0.514231 |  |
| SpaS | 152 | SpaR | 198 |  |  |  | 0.511071 |  |
| SpaS | 141 | SpaR | 207 |  |  |  | 0.5069   |  |

Empty fields mean no data available

EVC ratio characterizes the alignment quality, but this does not guarantee any intermol couplings to be found

RaptorX does not output residue number, this has to be checked manually

InvG177 only first 177 residues of InvG were analysed

**Supplementary Table 3: Cryo-EM data collection summary**

| <b>Sample</b>                                   | <b>WT</b>                                                 | <b>WT</b>   | <b>EA-KO</b> |
|-------------------------------------------------|-----------------------------------------------------------|-------------|--------------|
| Buffer                                          | 10 mM Tris-HCl, pH 8.0, 0.5 M NaCl, 5 mM EDTA., 0.1% LDAO |             |              |
| Vitrification                                   |                                                           |             |              |
| Grid                                            | graphene oxide                                            | carbon      | carbon       |
| <b>Data collection</b>                          |                                                           |             |              |
| Magnification, nominal                          | 130x                                                      | 130x        | 130x         |
| Energy filter slit, eV                          | not used                                                  | 10-15       | 10-15        |
| Defocus range, $\mu\text{m}$                    | 0.7-5.1                                                   | 0.3-5.2     | 0.4-5.1      |
| Voltage, kV                                     | 300                                                       | 300         | 300          |
| Microscope                                      | Titan Krios                                               | Titan Krios | Titan Krios  |
| Camera                                          | Gatan K2                                                  | Gatan K2    | Gatan K2     |
| Frame exposure time, s                          | 0.2                                                       | 0.2         | 0.2          |
| Dose per frame                                  | 1.24                                                      | 1.26        | 1.1          |
| Number of movie frames                          | 25                                                        | 25          | 25           |
| Total electron dose, $e^-/\text{\AA}^2$         | 31                                                        | 31.5        | 27.5         |
| Pixel size, $\text{\AA}$                        | 1.09                                                      | 1.09        | 1.09         |
| Number of micrographs<br>(for motioncorrection) | 9352                                                      | 10433       | 8190         |



**Supplementary Table 5: RMSD between SpaP and SpaQ conformations in EA**

**SpaP**

|    | P1    | P2    | P3    | P4    | P5 |
|----|-------|-------|-------|-------|----|
| P1 | -     |       |       |       |    |
| P2 | 1.739 | -     |       |       |    |
| P3 | 1.489 | 1.478 | -     |       |    |
| P4 | 2.871 | 3.446 | 3.104 | -     |    |
| P5 | 3.206 | 2.79  | 3.148 | 3.766 | -  |

**SpaQ**

|    | Q1    | Q2    | Q3    | Q4 |
|----|-------|-------|-------|----|
| Q1 | -     |       |       |    |
| Q2 | 1.726 | -     |       |    |
| Q3 | 2.165 | 1.32  | -     |    |
| Q4 | 2.418 | 2.265 | 2.326 | -  |

All values are in Å, calculated in UCSF Chimera after a structure/sequence alignment with MatchMaker

**Table 6: Strains, plasmids and antibodies used in this study**

| <b>Salmonella strains</b> | <b>Description</b>                 | <b>Parent strain</b> | <b>Reference*</b>   |
|---------------------------|------------------------------------|----------------------|---------------------|
| SB905                     | Wild type strain, flagellar KO ... | SJW2941              | 2                   |
| SB906                     | Deletion of <i>prgH</i> gene       | SB905                | gift from Galán lab |
| SB908                     | Deletion of <i>invG</i> gene       | SB905                | This work           |
| SB1171                    | Deletion of <i>invG</i> gene       | SB905                | gift from Galán lab |
| WHS06                     | SB906 complemented with WHS006     | SB905                | gift from Galán lab |
| WHS08                     | SB908 complemented with WHS008     | SB905                | This work           |

  

| <b>Plasmids</b> | <b>Description</b>                                          | <b>Parent plasmid</b> | <b>Reference</b>    |
|-----------------|-------------------------------------------------------------|-----------------------|---------------------|
| WHS006          | Complementation plasmid with <i>prgH</i> gene               | N/A                   | gift from Galán lab |
| WHS008          | Complementation plasmid with <i>invG</i> gene               | WHS006                | This work           |
| pCP20           | Encodes yeast Flp recombinase                               | N/A                   | 30                  |
| pSB1418         | Encodes <i>hilA</i> gene - overexpression of the SPI-I T3SS | N/A                   | 31                  |
| pACYC-SptP3-GFP | Encodes trapped substrate with GFP                          | pACYC                 | 6                   |

  

| <b>Phage</b> | <b>Description</b>                                                                      |
|--------------|-----------------------------------------------------------------------------------------|
| P22          | Salmonella specific phage - transfer of genetically modified area to a clean background |

  

| <b>Antibody</b> | <b>Description</b>                   | <b>Specific target</b> | <b>Reference</b>                                                                      |
|-----------------|--------------------------------------|------------------------|---------------------------------------------------------------------------------------|
| anti-NC         | rabbit anti NC polyclonal antibody   | Needle complex         | 6                                                                                     |
| anti-InvG       | rabbit anti InvG polyclonal antibody | InvG domains N0-N1     | Medical University of Vienna,<br>Department of Medical Biochemistry,<br>Prof. Hermann |
| anti-SptP       | rabbit anti SptP polyclonal antibody | SptP amino acids 1-295 | 6                                                                                     |

\* reference numbering as in Materials and Methods



**Supplementary Table 7: T3SS protein naming**

| <b>Protein name</b> | <b>Unified nomenclature</b> | <b>UniProt ID</b> | <b>Flagellar homologue</b> |
|---------------------|-----------------------------|-------------------|----------------------------|
| InvA                | SctV                        | P0A1I3            | FlhA                       |
| InvG                | SctC                        | P35672            | -                          |
| PrgH                | SctD                        | P41783            | FliG                       |
| PrgI                | SctF                        | P41784            | -                          |
| PrgJ                | SctI                        | P41785            | -                          |
| PrgK                | SctJ                        | P41786            | FliF                       |
| SpaP                | SctR                        | P40700            | FliP                       |
| SpaQ                | SctS                        | P0A1L7            | FliQ                       |
| SpaR                | SctT                        | P40701            | FliR                       |
| SpaS                | SctU                        | P40702            | FlhB                       |
